# Supplementary material for: Large-scale comparative analysis of cytogenetic markers across Lepidoptera
Source: PubMed Central journal article supplement (PMC8190105; doi:10.1038/s41598-021-91665-7), 2021-06-09
Supplement: 41598_2021_91665_MOESM1_ESM.pdf [file 41598_2021_91665_MOESM1_ESM.pdf]

**Supplementary Figures and Tables for**  
**Large-scale comparative analysis of cytogenetic markers across Lepidoptera**

by

Irena Provazníková, Martina Hejníčková, Sander Visser, Martina Dalíková, Leonela Z. Carabajal Paladino, Magda Zrzavá, Anna Voleníková, František Marec, and Petr Nguyen\*

\* Correspondence to:  
Petr Nguyen  
[petr.nguyen@prf.jcu.cz](mailto:petr.nguyen@prf.jcu.cz)

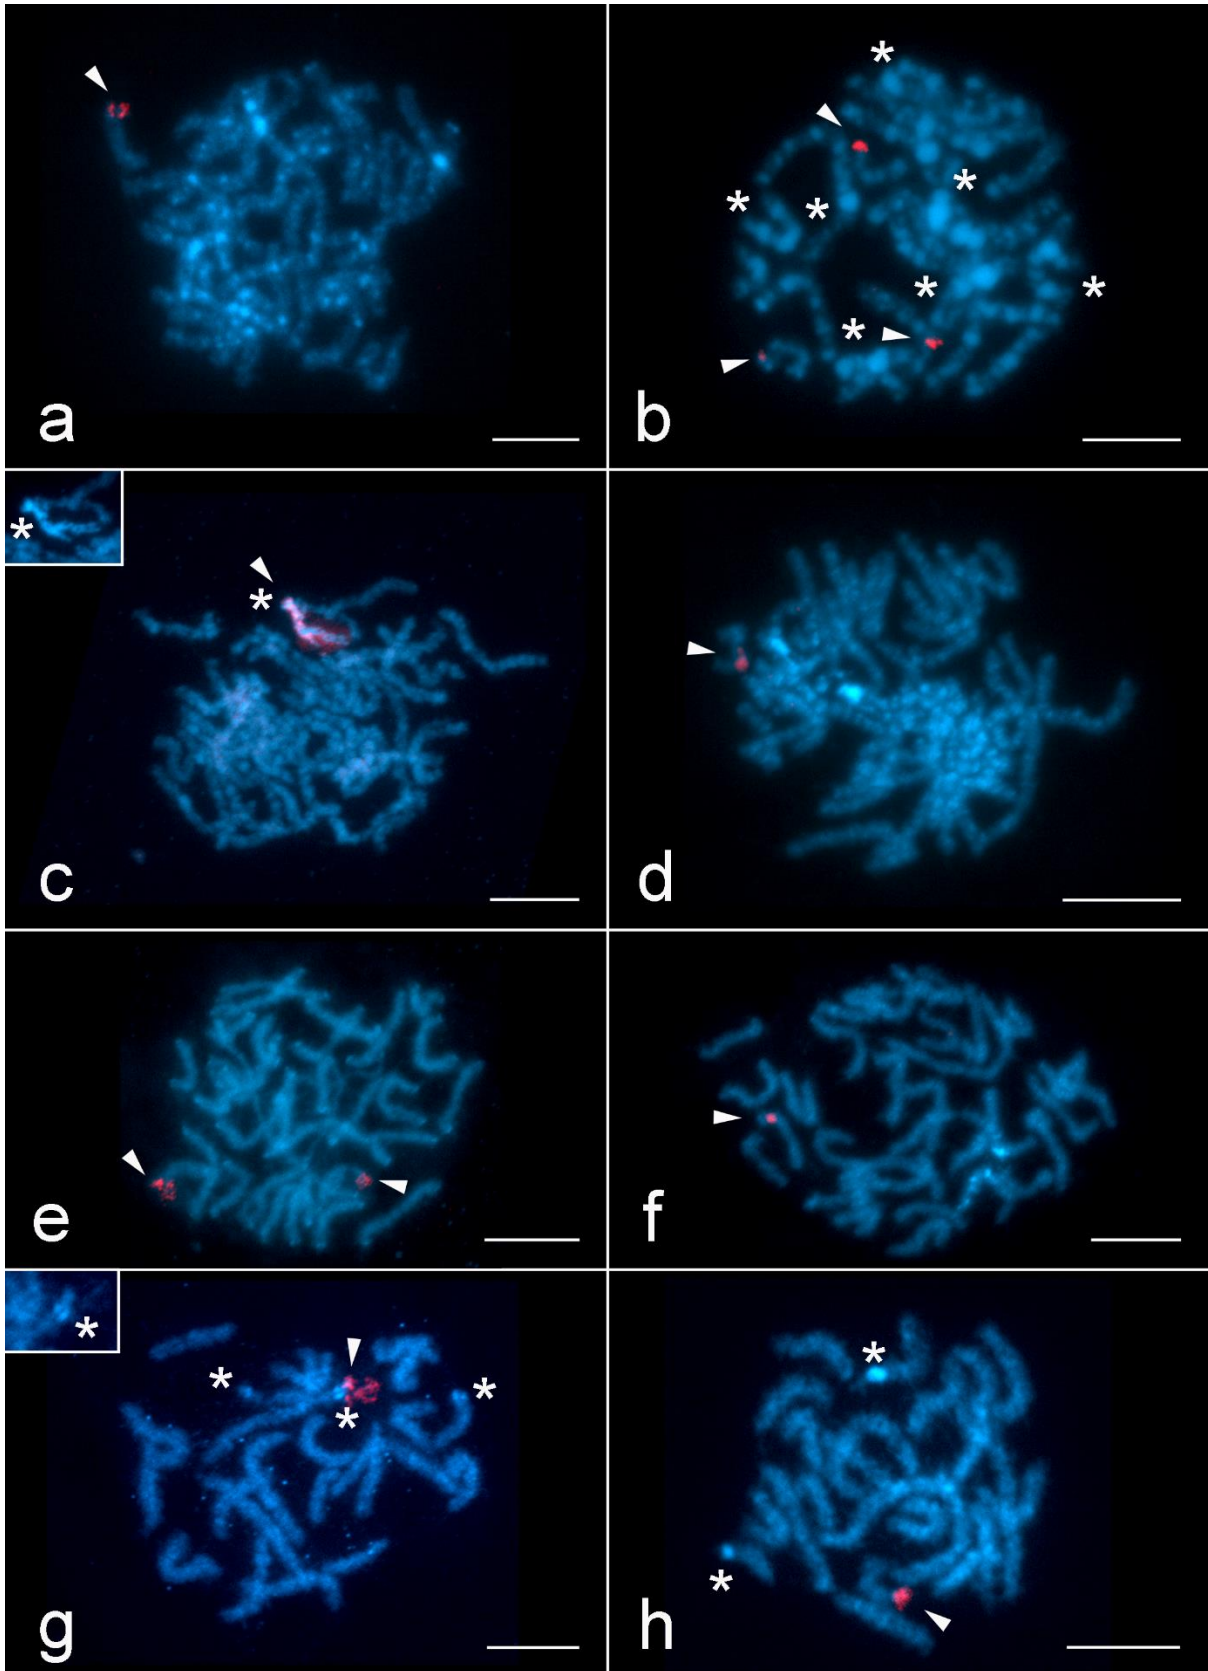

**Supplementary Figure 1:** Major rDNA and histone H3 clusters detected by rDNA FISH and TSA-FISH, respectively, on pachytene nuclei of representatives of the caddisfly superfamily Limnephiloidea (Trichoptera) and lepidopteran superfamilies Hepialoidea and Tischerioidea. **a, c, e, g** – FISH with 18S rDNA probe (red signals marked by arrowheads); **b, d, f, h** – TSA-FISH with histone H3 probe (red

signals marked by arrowheads). Chromosomes are counterstained with DAPI (blue). **a, b** – pachytene nuclei of the caddisfly *Glyptotaelius pellucidus* (sex not determined); **c, d** – male pachytene nuclei of *Hepialus humuli*, note that the rDNA signals cover approximately half of one of the chromosomal bivalents and colocalize with heterochromatin (C and inset); **e** – female pachytene nucleus of *Phymatopus californicus*, **f** – male pachytene nucleus of *P. californicus*; **g, h** – male pachytene nuclei of *Tischeria ekebladella*, note that the cluster of rDNA signals is adjacent to a pair of heterochromatin blocks (**g** and inset). \* DAPI positive heterochromatin. Scale bar = 10  $\mu\text{m}$ .

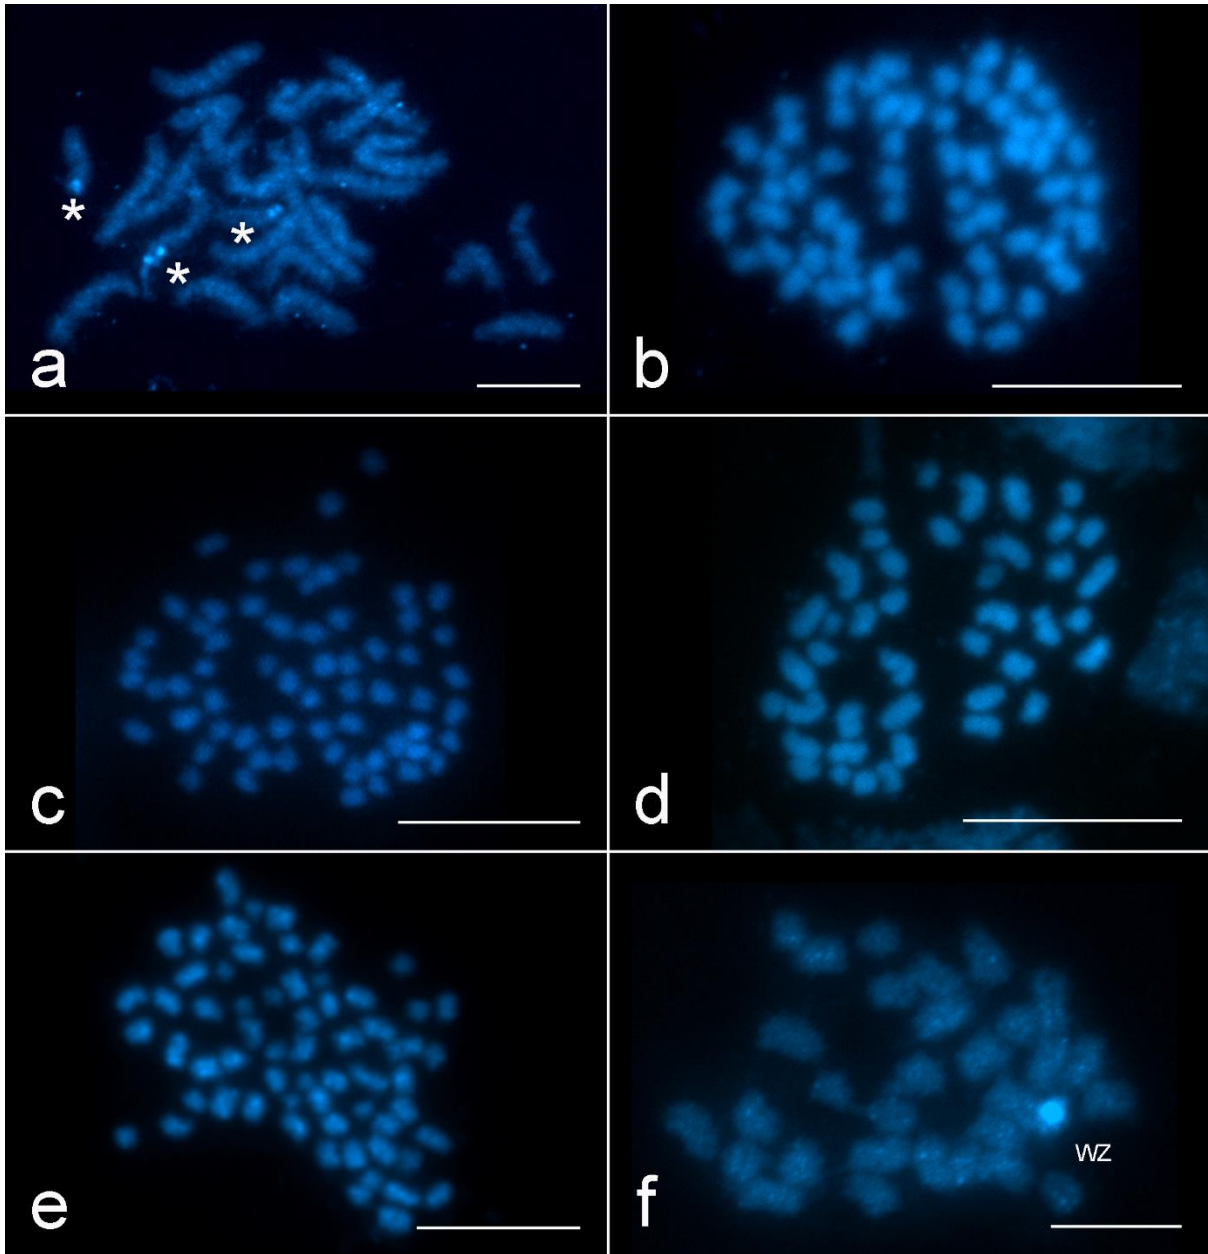

**Supplementary Figure 2:** Karyotypes of species with previously reported chromosome numbers. Chromosomes are counterstained by DAPI (blue). **a** – male pachytene nucleus of *Tischeria ekebladella* with 23 bivalents and DAPI positive heterochromatin marked by asterisks; **b** – male mitotic nucleus of *Aglais urticae* consisting of  $2n=62$  chromosomes; **c** - female mitotic nucleus of *Inachis io* comprising  $2n=62$ ; **d** - male mitotic nucleus of *Cerura vinula* comprising  $2n=42$  chromosomes; **e** - male mitotic nucleus of *Euthrix potatoria* comprising  $2n=62$  chromosomes; **f** - female post-pachytene nucleus of *Hyalophora cecropia* nurse cell with  $n=31$  bivalents; note DAPI positive W chromosome. Scale bar = 10  $\mu\text{m}$ .

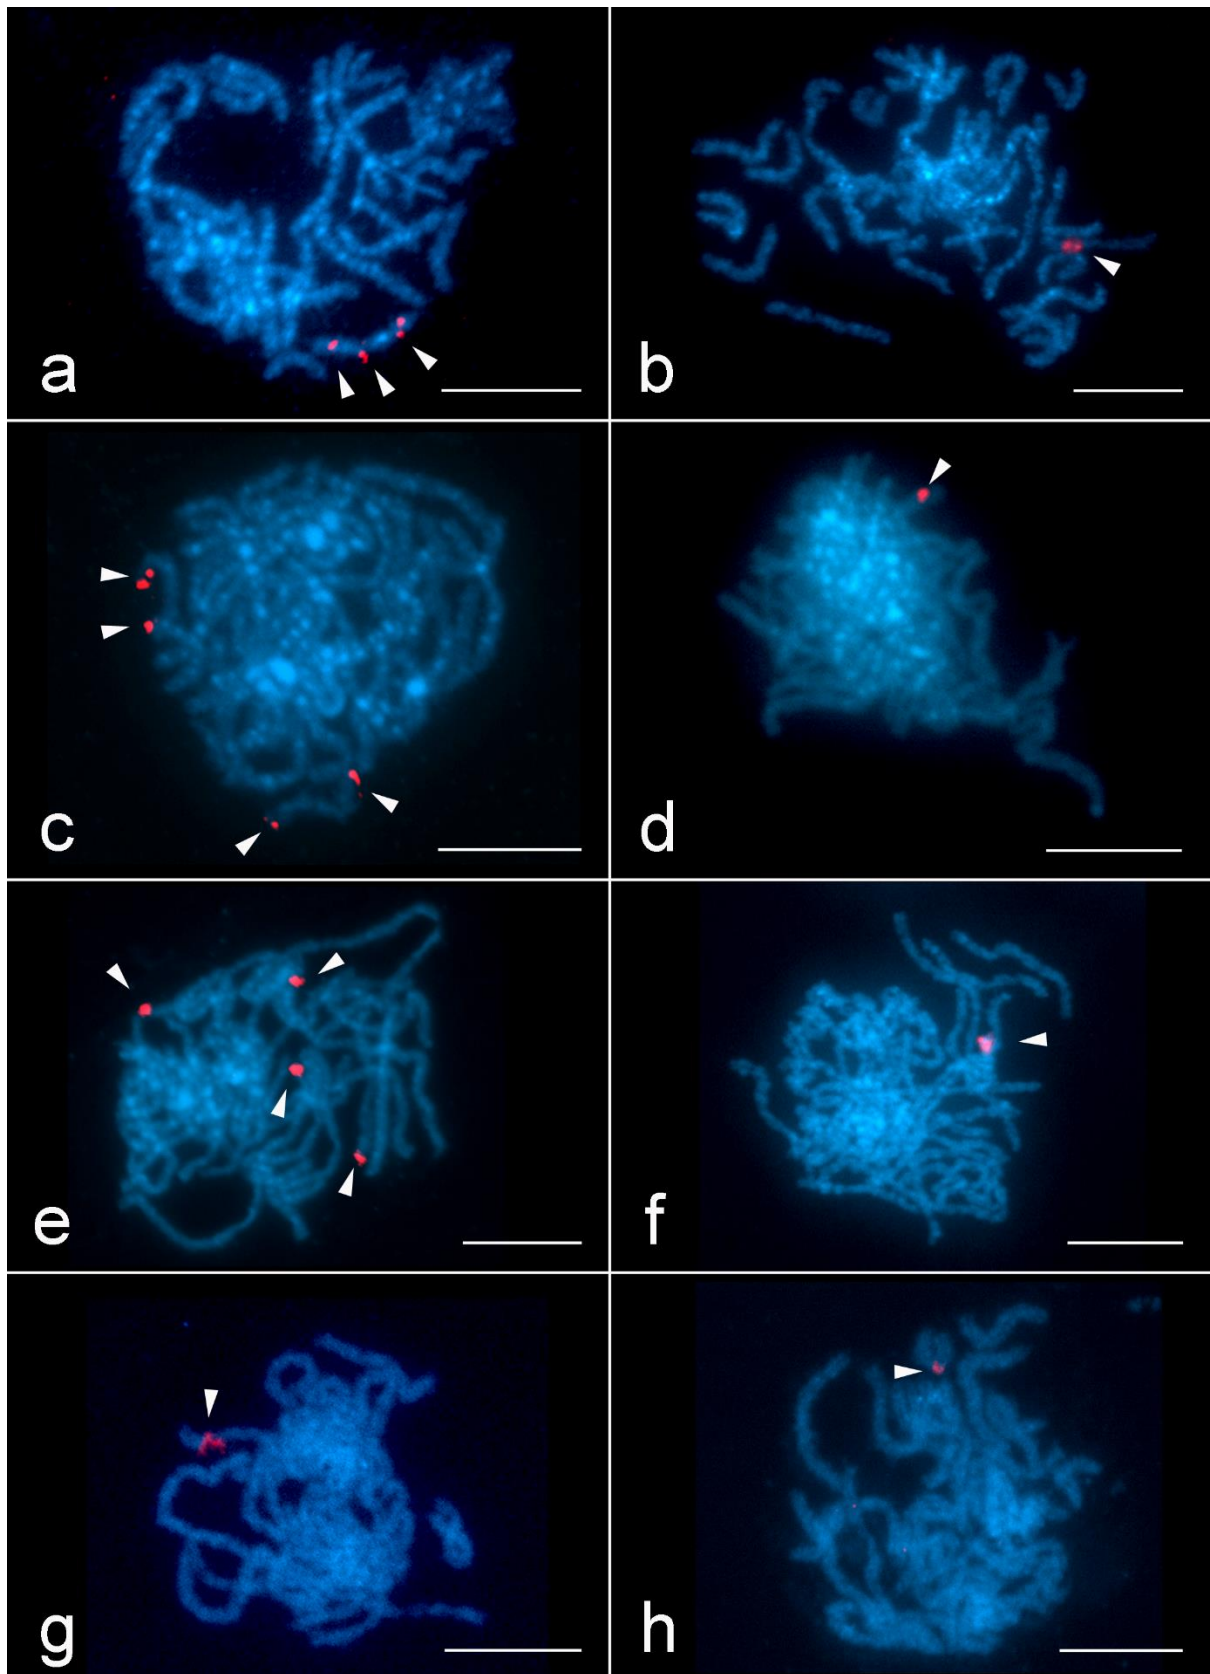

**Supplementary Figure 3:** Major rDNA and histone H3 clusters detected by rDNA FISH and TSA-FISH, respectively, on pachytene nuclei of four representatives of the superfamily Tineoidea. **a, c, e, g** – FISH with 18S rDNA probe (red signals marked by arrowheads); **b, d, f, h** – TSA FISH with histone H3 probe (red signals marked by arrowheads). Chromosomes are counterstained with DAPI (blue). **a, b** –

female pachytene nucleus of *Taleporia tubulosa*; **c, d** – male pachytene nucleus of *Proutia betulina*; **e** – male pachytene nucleus of *Psyche crassiorella*, **f** – female pachytene nucleus of *P. crassiorella*; **g, h** – male pachytene nucleus of *Tineola bisselliella*. Scale bar = 10  $\mu\text{m}$ .



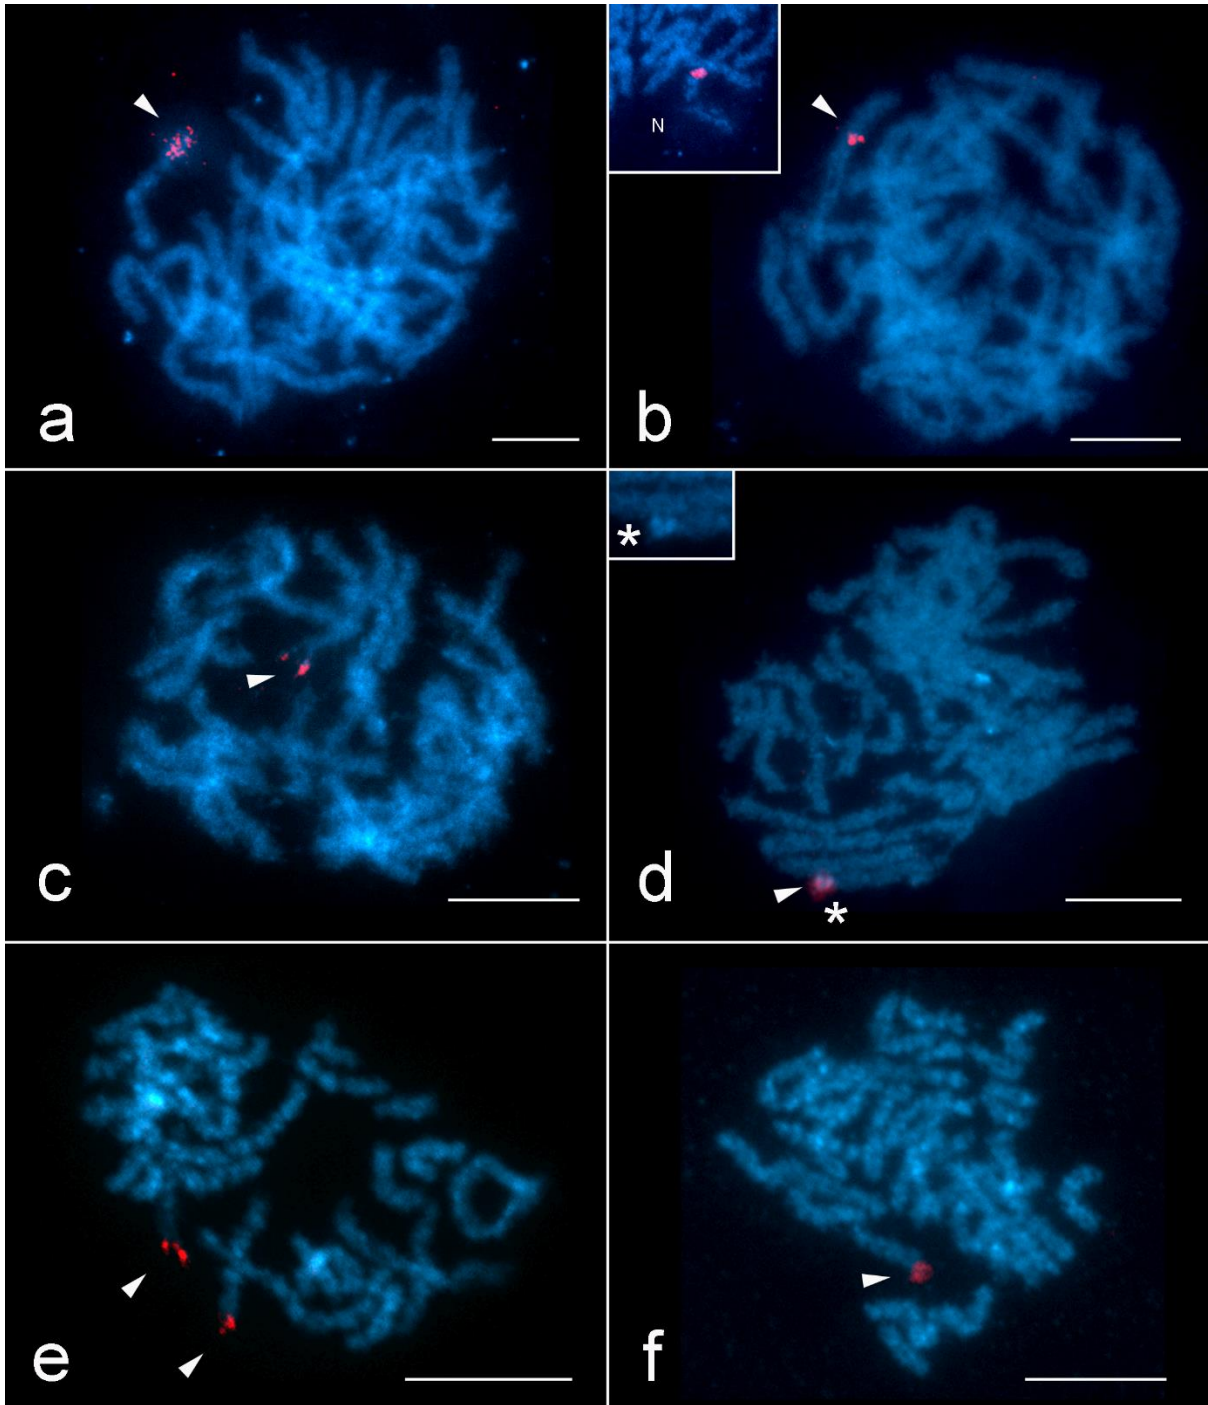

**Supplementary Figure 4:** Major rDNA and histone H3 loci detected by rDNA FISH and TSA-FISH, respectively, on pachytene nuclei of representatives of the superfamilies Gracillaroidea and Yponomeutoidea. **a, c, e** – FISH with rDNA probe (red signals marked by arrowheads); **b, d, f** – TSA-FISH with histone H3 probe (red signals marked by arrowheads). Chromosomes are counterstained with DAPI (blue). **a, b** – male nucleus of *Cameraria ohridella*, note the visible nucleolus (N) and histone H3 signal present on the same chromosome pair (**b**, inset); **c, d** – male nucleus of *Plutella xylostella*, note that the histone H3 locus is associated with a pair of heterochromatin blocks (**d** and inset).; **e, f** – female pachytene nucleus of *Yponomeuta evonymella*. \* DAPI positive heterochromatin. Scale bar = 10  $\mu$ m.

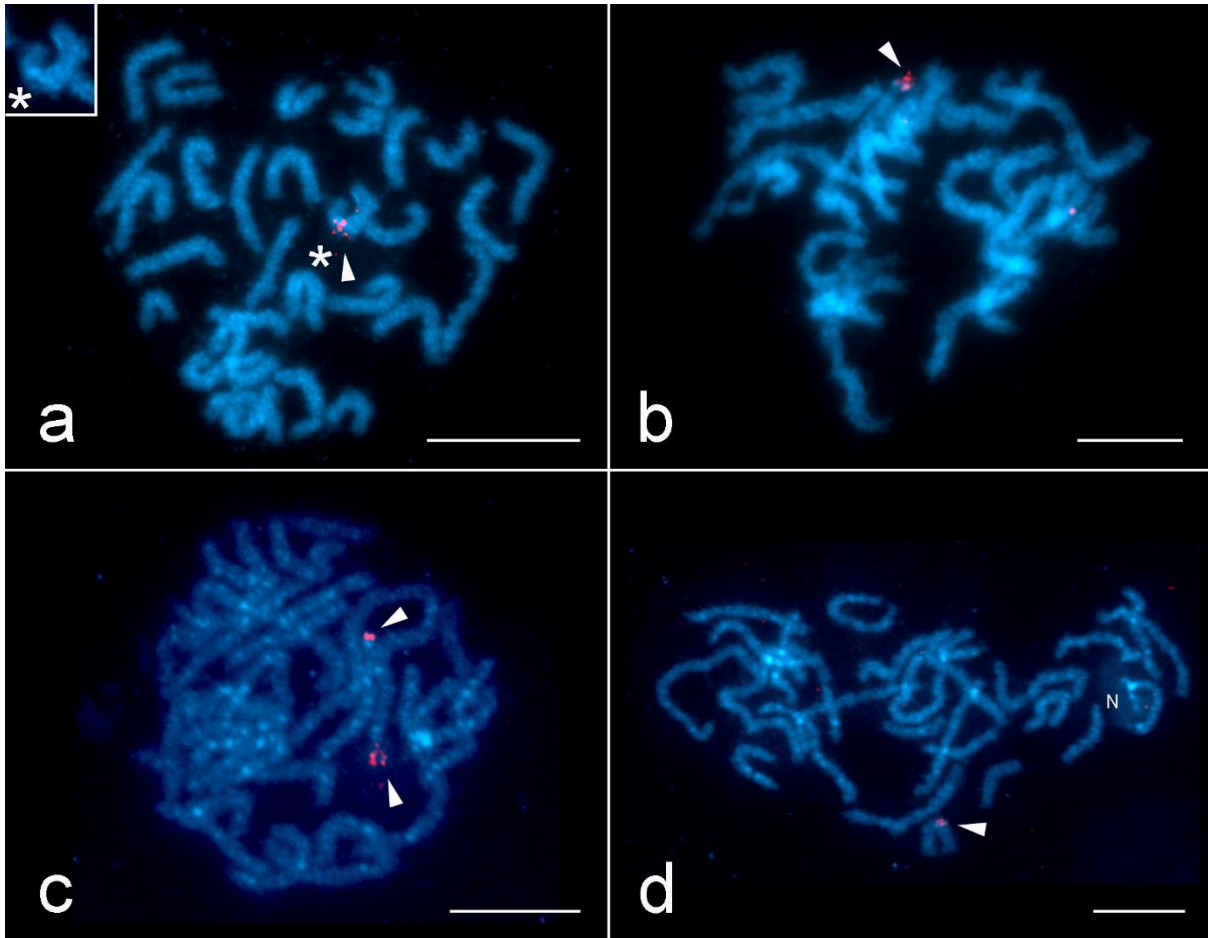

**Supplementary Figure 5:** Major rDNA and histone H3 clusters detected by rDNA FISH and TSA-FISH, respectively, on pachytene nuclei of representatives of the superfamilies Cossoidea and Tortricoidea. **a, c** – FISH with 18S rDNA probe (red signals marked by arrowheads); **b, d** – TSA-FISH with histone H3 probe (red signals marked by arrowheads). Chromosomes are counterstained with DAPI (blue). **a** – male pachytene nucleus of *Cossus cossus* with 30 visible chromosomal pairs ( $2n=60$ ), note that 18S rDNA signal colocalizes with heterochromatin (**a** and inset); **b** – male pachytene nucleus of *C. cossus*; **c, d** – male pachytene nuclei of *Cydia pomonella*. \* DAPI positive heterochromatin. N – nucleolus. Scale bar = 10  $\mu$ m.



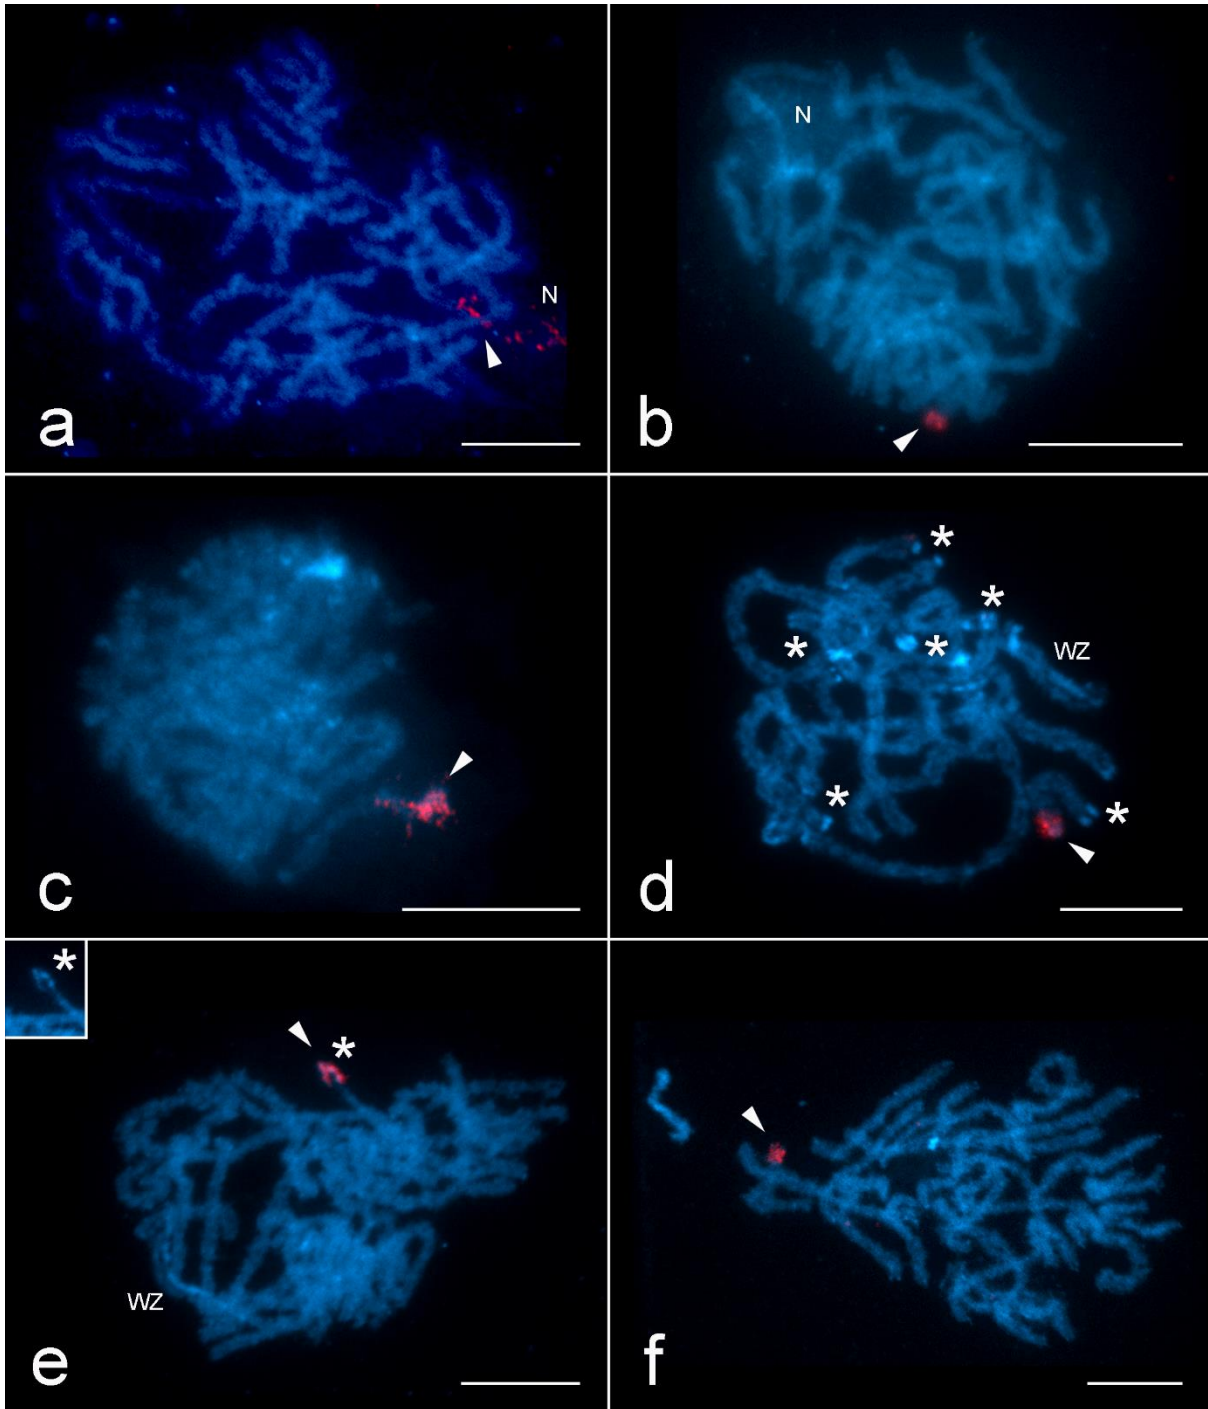

**Supplementary Figure 6:** Major rDNA and histone H3 clusters detected by rDNA FISH and TSA-FISH, respectively, on pachytene nuclei of three representatives of the family Pieridae (Papilionoidea). **a, c, e** – FISH with 18S rDNA probe (red signals marked by arrowheads); **b, d, f** – TSA-FISH with histone H3 probe (red signals marked by arrowheads). Chromosomes are counterstained with DAPI (blue). **a, b** – male pachytene nucleus of *Pieris rapae*; **c, d** – female pachytene nucleus of *Pieris brassicae*; **e, f** – female pachytene nucleus of *Gonepteryx rhamni*, note that 18S rDNA signal colocalizes with heterochromatin (**e** and inset); WZ – sex chromosome bivalent. N – nucleolus. \* DAPI positive heterochromatin. Scale bar = 10  $\mu$ m.

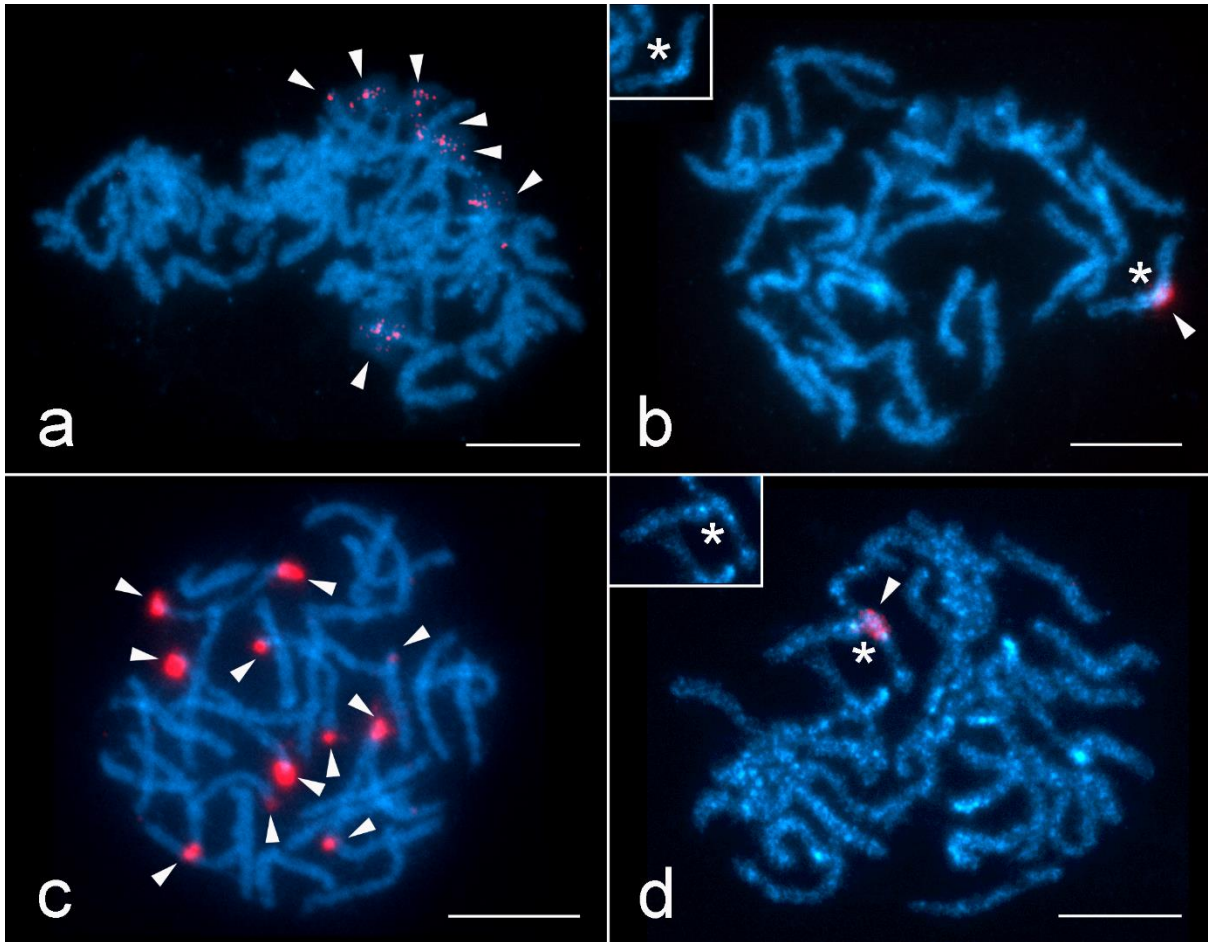

**Supplementary Figure 7:** Major rDNA and histone H3 clusters detected by rDNA FISH and TSA-FISH, respectively, on pachytene nuclei of two representatives of the family Nymphalidae (Papilionoidea). **a, c** – FISH with 18S rDNA probe (red signals marked by arrowheads); **b, d** – TSA-FISH with histone H3 probe (red signals marked by arrowheads). Chromosomes are counterstained with DAPI (blue). **a** – male pachytene nucleus of *Aglais urticae*, **b** – female pachytene nucleus of *A. urticae*, note that histone H3 signal colocalizes with heterochromatin (**b** and inset); **c, d** – female pachytene nuclei of *Inachis io*, note that histone H3 signal colocalizes with heterochromatin (**d** and inset). \* DAPI positive heterochromatin. Scale bar = 10  $\mu$ m.

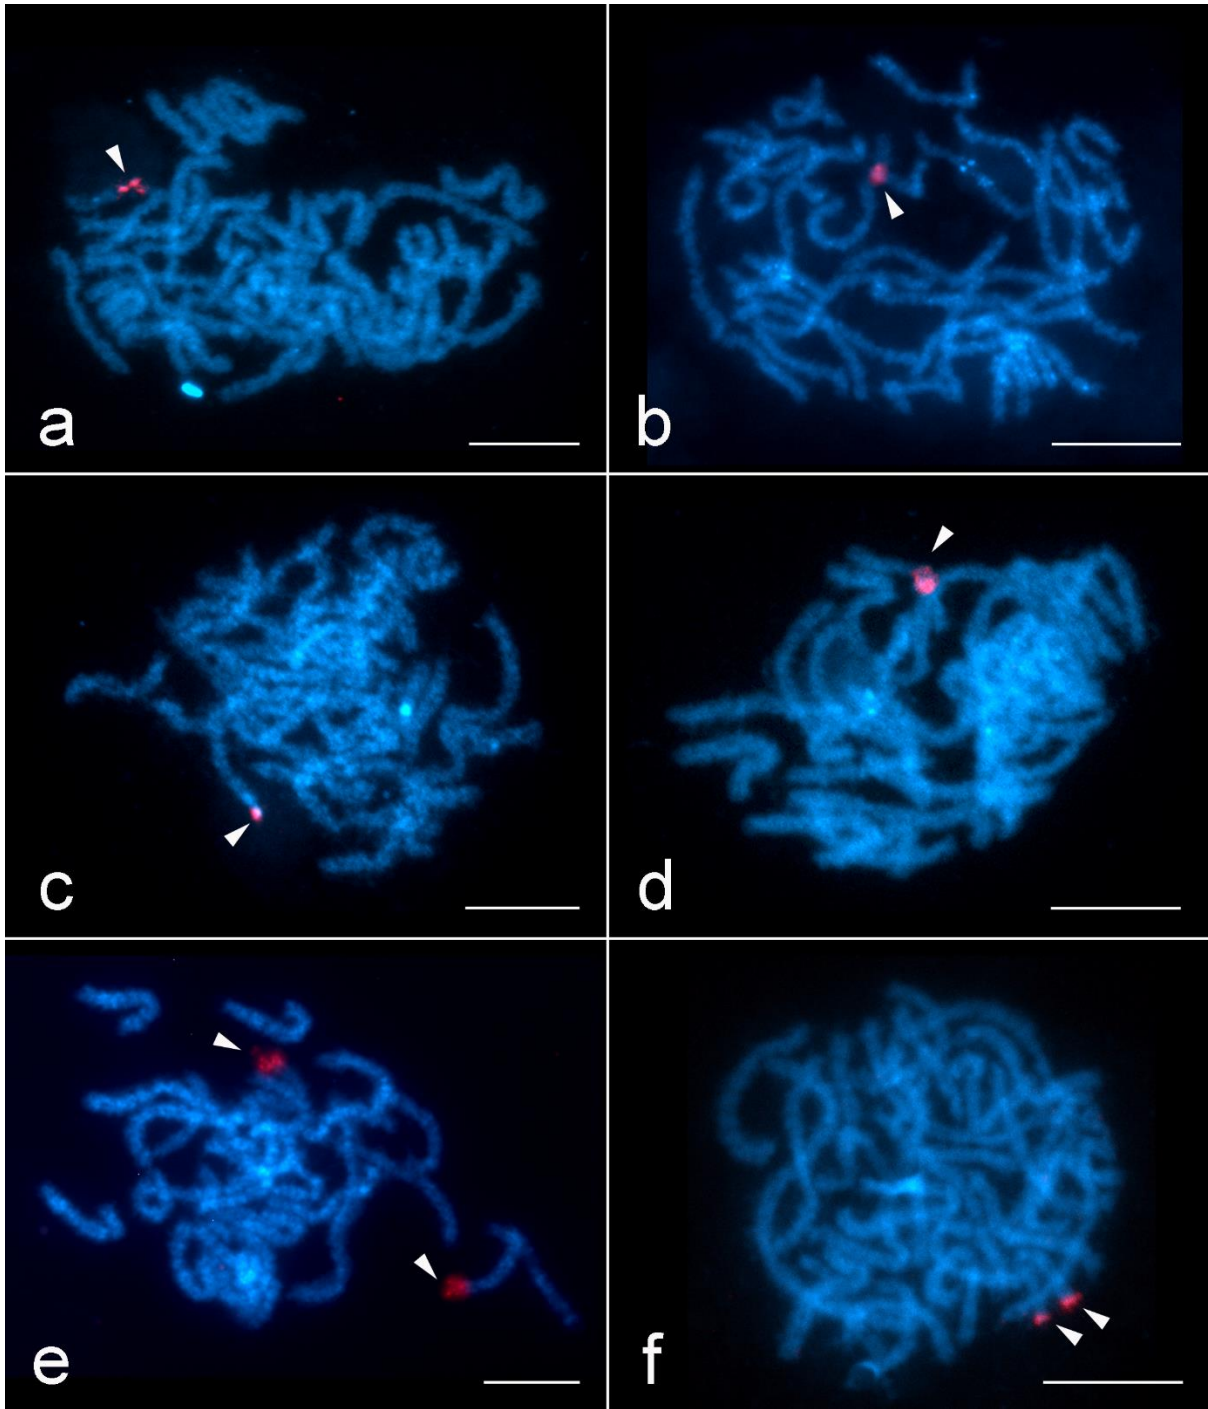

**Supplementary Figure 8:** Major rDNA and histone H3 clusters detected by rDNA FISH and TSA-FISH, respectively, on pachytene nuclei of three representatives of the superfamily Gelechioidea. **a, c, e** – FISH with 18S rDNA probe (red signals marked by arrowheads); **b, d, f** – TSA-FISH with histone H3 probe (red signals marked by arrowheads). Chromosomes are counterstained with DAPI (blue). **a, b** – male pachytene nuclei of *Depressaria daucella*; **c, d** – male pachytene nuclei of *Limnaecia phragmitella*, note that the 18S rDNA signal colocalizes with heterochromatin (**c**); **e, f** – male pachytene nuclei of *Tuta absoluta*. Scale bar = 10  $\mu$ m.



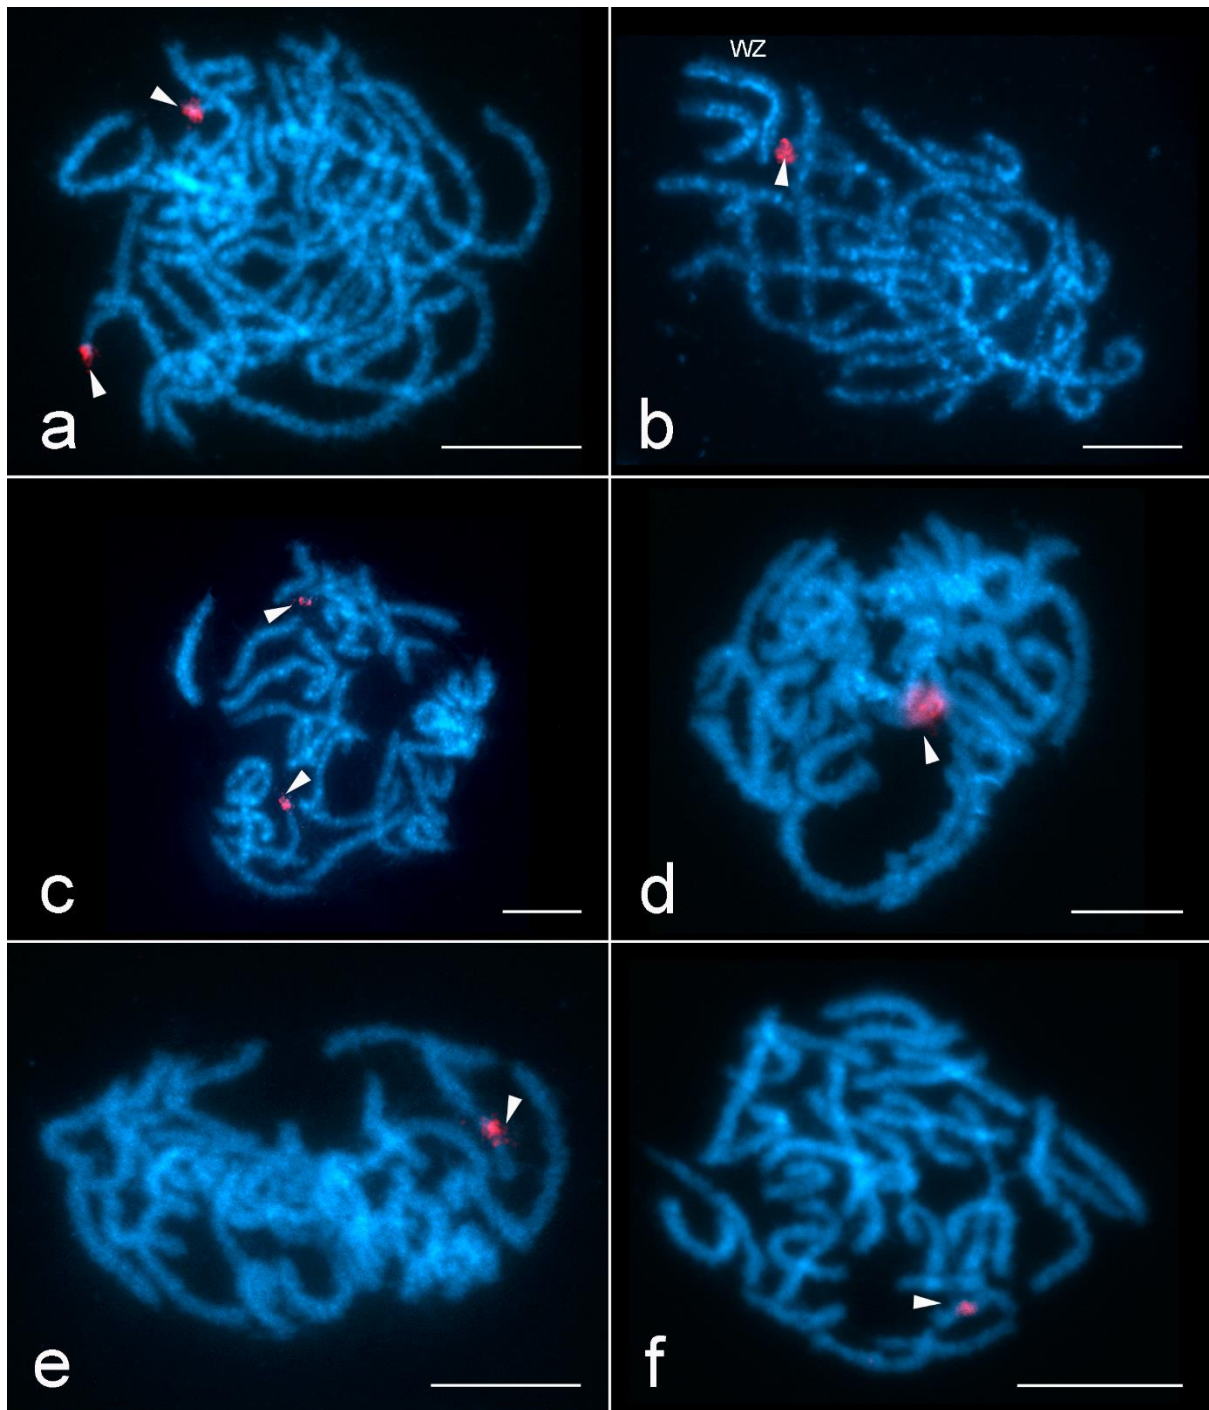

**Supplementary Figure 9:** Major rDNA and histone H3 clusters detected by rDNA FISH and TSA-FISH, respectively, on pachytene nuclei of three representatives of the superfamily Noctuoidea. **a, c, e** – FISH with 18S rDNA probe (red signals marked by arrowheads); **b, d, f** – TSA-FISH with histone H3 probe (red signals marked by arrowheads). Chromosomes are counterstained with DAPI (blue). **a** – male pachytene nucleus of *Cerura vinula*, **b** – female pachytene nucleus of *C. vinula*; **c, d** – female pachytene nuclei of *Phalera bucephala*; **e, f** – male pachytene nuclei of *Spodoptera frugiperda*. WZ – sex chromosome bivalent. Scale bar = 10  $\mu$ m.

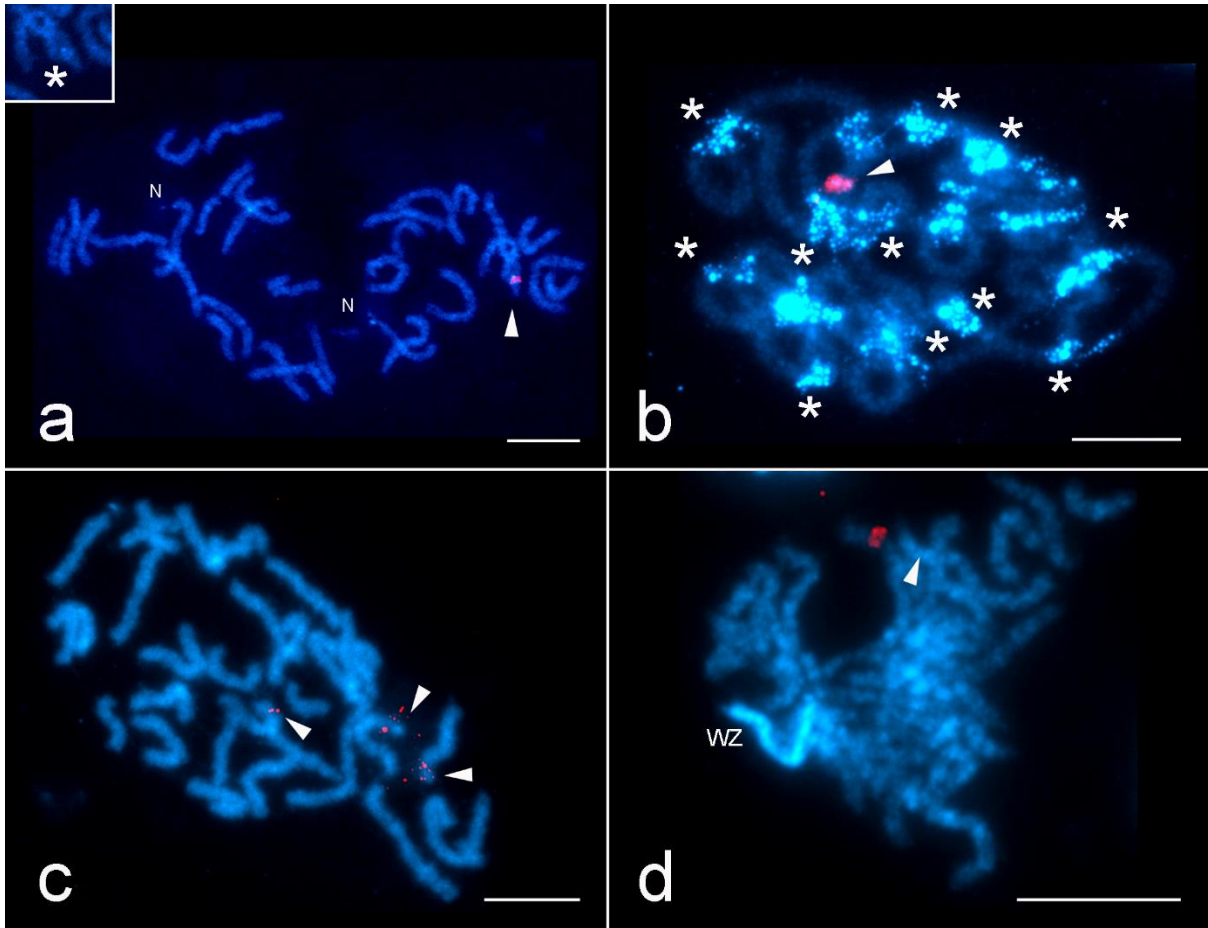

**Supplementary Figure 10:** Major rDNA and histone H3 clusters detected by rDNA FISH and TSA-FISH, respectively, on pachytene nuclei of representatives from superfamilies Pyraloidea and Geometroidea. **c** – FISH with 18S rDNA probe (red signals marked by arrowheads); **a**, **b**, **d** – TSA-FISH with histone H3 probe (red signals marked by arrowheads). Chromosomes are counterstained with DAPI (blue). **a** – male pachytene nucleus of *Ephestia kuehniella* with two visible nucleoli (N), note that histone H3 signal colocalizes with heterochromatin (**a**, inset); **b** – male pachytene nucleus of *Abraxas grossulariata*; **c** – male pachytene nucleus of *Biston betularia*, **d** – female pachytene nucleus of *B. betularia*. WZ – sex chromosome bivalent. \* DAPI positive heterochromatin. Scale bar = 10 µm.



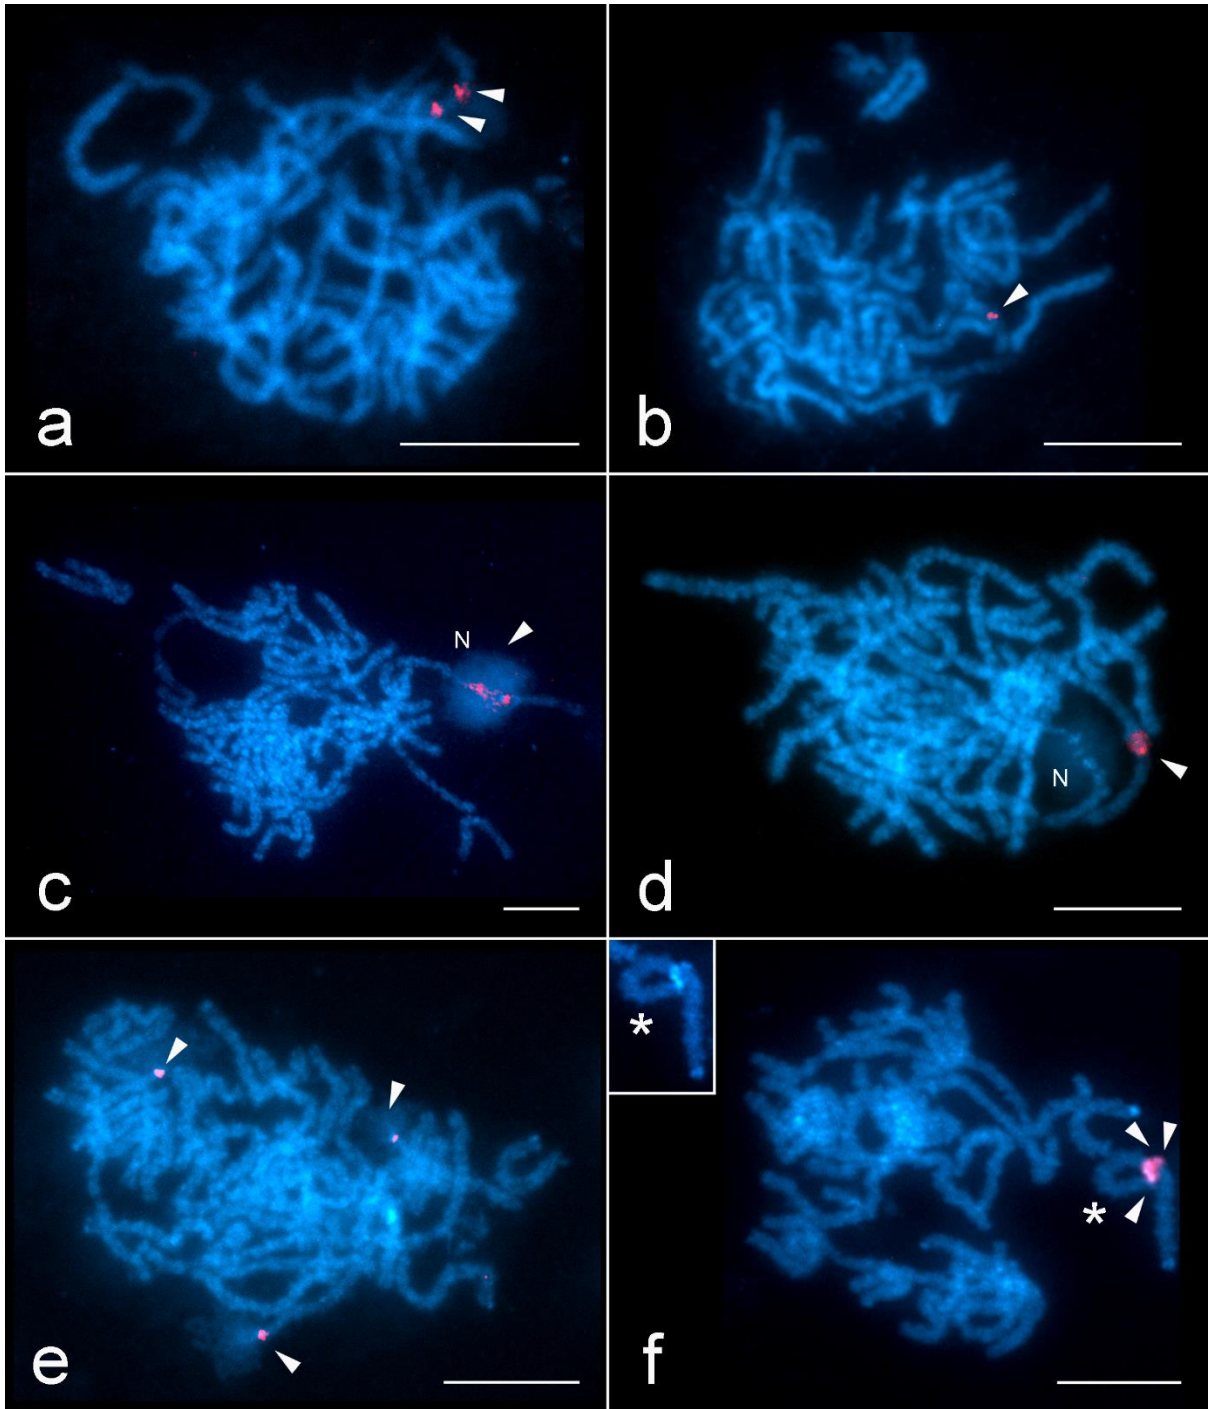

**Supplementary Figure 11:** Major rDNA and histone H3 clusters detected by rDNA FISH and TSA-FISH, respectively, on pachytene nuclei of three representatives of the superfamily Bombycoidea. **a, c, e** – FISH with 18S rDNA probe (red signals marked by arrowheads); **b, d, f** – TSA-FISH with histone H3 probe (red signals marked by arrowheads). Chromosomes are counterstained with DAPI (blue). **a, b** – male pachytene nuclei of *Euthrix potatoria*; **c, d** – male pachytene nuclei of *Bombyx mori* with visible nucleolus (N); **e** – male pachytene nucleus of *Hyalophora cecropia*, **f** – female pachytene nucleus of *H. cecropia*, note that the histone H3 signals colocalize with heterochromatin (**f**, inset). N – nucleolus. \* DAPI positive heterochromatin. Scale bar = 10  $\mu$ m.

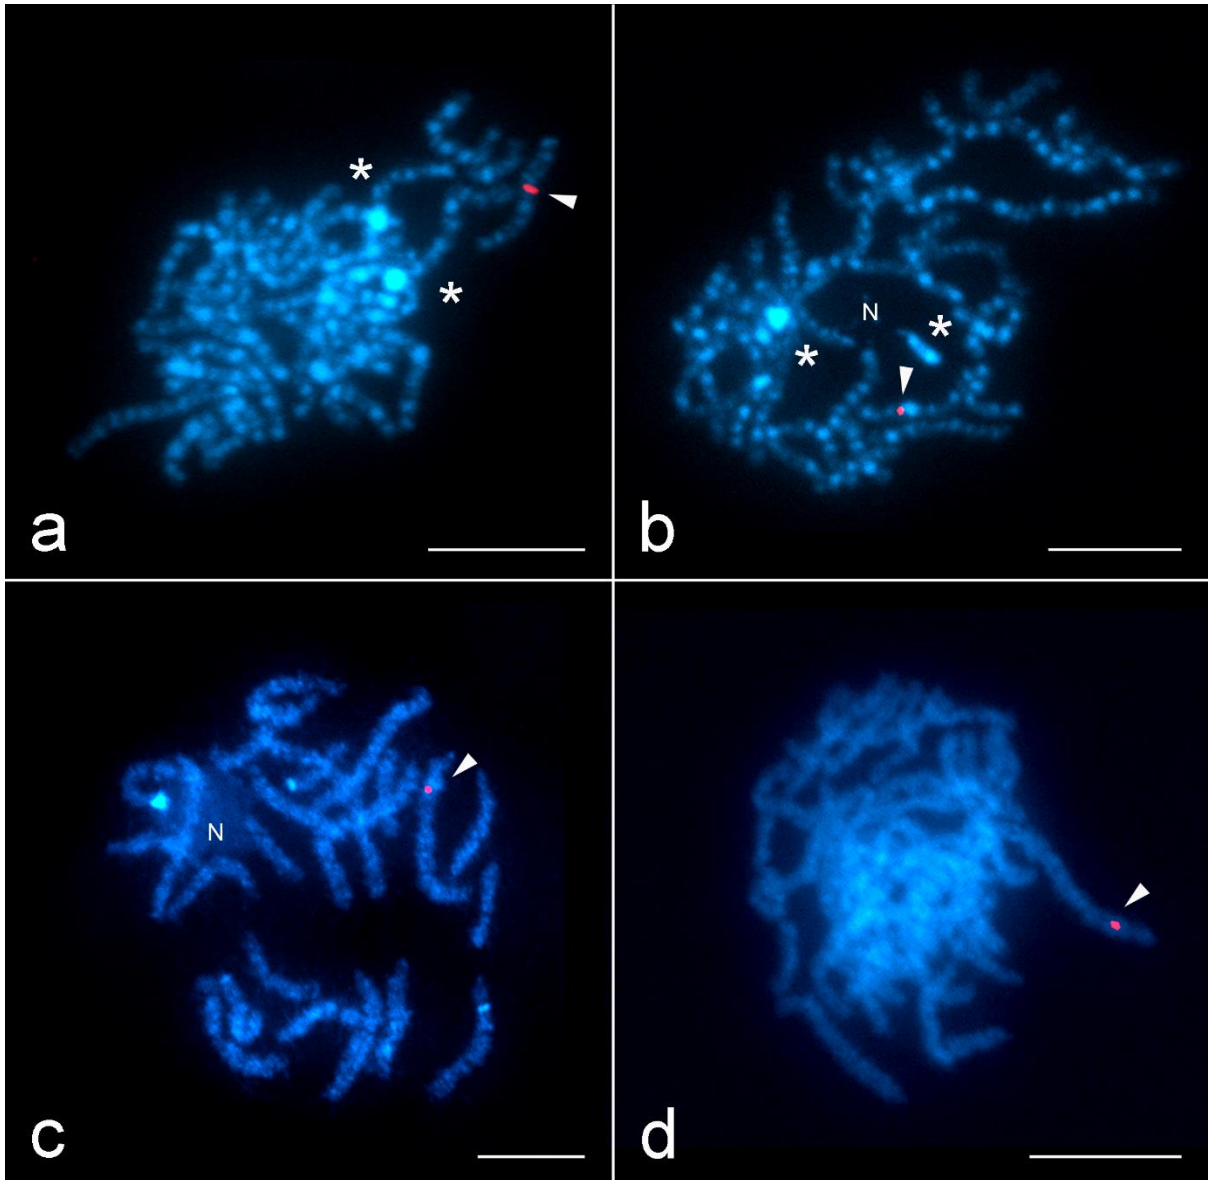

**Supplementary Figure 12:** 5S rDNA clusters detected by TSA-FISH on pachytene nuclei of representatives of the caddisfly superfamily Limnephiloidea (Trichoptera) and lepidopteran superfamilies Hepialoidea, Tischerioidea, and Tineoidea. TSA-FISH with 5S rDNA probe (red signals and arrowheads). Chromosomes are counterstained with DAPI (blue). **a** – pachytene nucleus of *Glyphotaelius pellucidus* (sex not determined), **b** – male pachytene nucleus of *Hepialus humuli* with visible nucleolus (N), **c** – male pachytene nucleus of *Tischeria ekebladella* with visible nucleolus (N), **d** – male pachytene nucleus of *Taleporia tubulosa*. \* DAPI positive heterochromatin. Scale bar = 10  $\mu\text{m}$ .

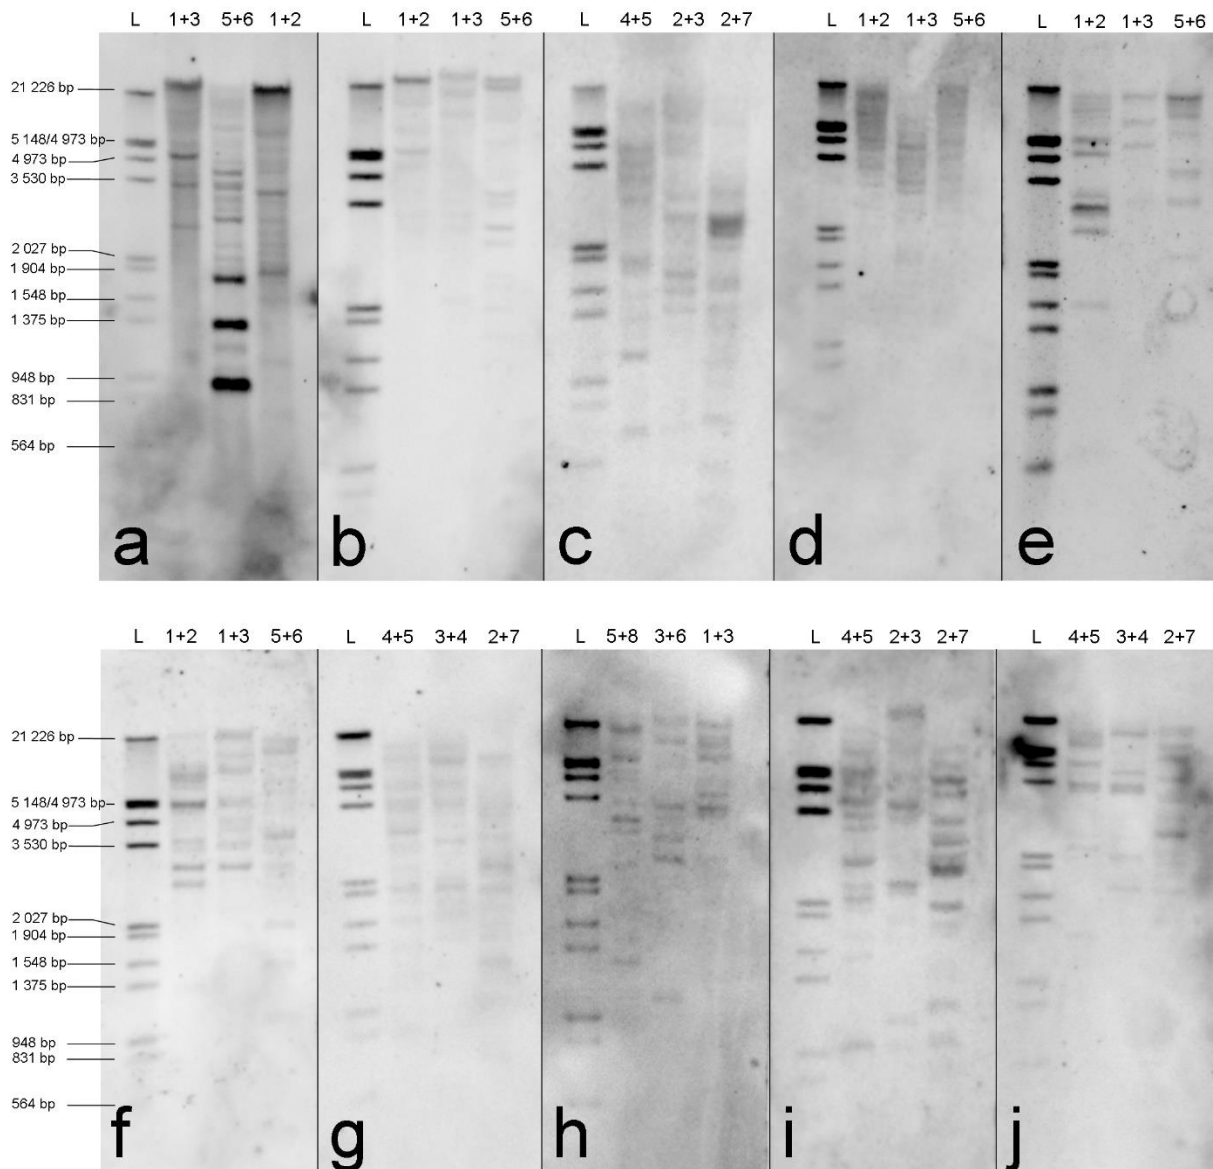

**Supplementary Figure 13:** Results of Southern hybridization of 5S rDNA probes with genomic DNAs of ten selected species. **a** – *Glyphotaelius pellucidus*, **b** – *Hepialus humuli*, **c** – *Tischeria ekebladella*, **d** – *Taleporia tubulosa*, **e** – *Tineola bisselliella*, **f** – *Cameraria ohridella*, **g** – *Yponomeuta evonymella*, **h** – *Cydia pomonella*, **i** – *Ephestia kuehniella*, **j** – *Bombyx mori*. **L** – DNA molecular weight marker III (Roche Diagnostics GmbH). Restriction enzymes: **1** *AfeI*, **2** *XbaI*, **3** *BamHI*, **4** *BspHI*, **5** *PstI*, **6** *SalI*, **7** *NspI*, **8** *NotI*. For details on enzymatic digestion reactions, see Table S7.

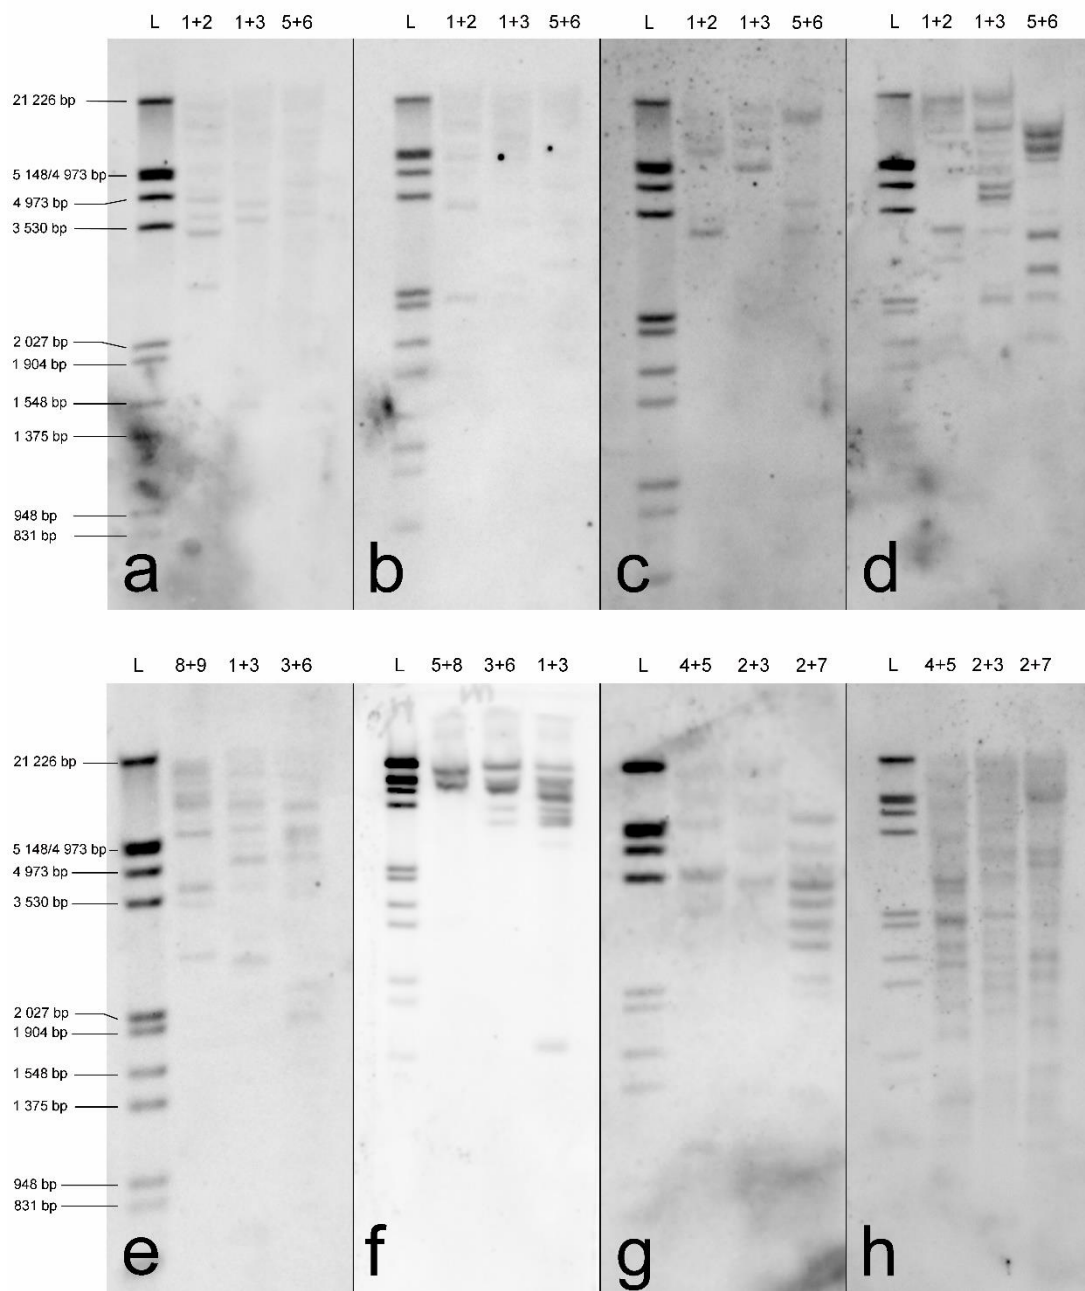

**Supplementary Figure 14:** Results of Southern hybridisation of U1 snRNA probes with genomic DNA of selected species. Note that multiple bands of varying intensity can be seen in most species. **a** – *Glyphotaelius pellucidus*, **b** – *Hepialus humuli*, **c** – *Tineola bisselliella*, **d** – *Cameraria ohridella*, **e** – *Yponomeuta evonymella*, **f** – *Cydia pomonella*, **g** – *Ephestia kuehniella*, **h** – *Bombyx mori*. **L** – DNA molecular weight marker III (Roche Diagnostics GmbH). Restriction enzymes: **1** *AfeI*, **2** *XbaI*, **3** *BamHI*, **4** *BspHI*, **5** *PstI*, **6** *Sall*, **7** *NspI*, **8** *NotI*, **9** *XhoI*. For details on enzymatic digestion reactions, see Table S7.

**Supplementary Table 1:** Genes sequenced in this study and their NCBI accession numbers.

| <b>Species</b>                  | <b>Gene</b> | <b>NCBI AN</b> |
|---------------------------------|-------------|----------------|
| <i>Glyphotaelius pellucidus</i> | U1 snRNA    | MW149037       |
| <i>Hepialus humuli</i>          | U1 snRNA    | MW149038       |
| <i>Tischeria ekebladella</i>    | U1 snRNA    | MW149039       |
| <i>Tineola bisselliella</i>     | U1 snRNA    | MW149040       |
| <i>Taleporia tubulosa</i>       | U1 snRNA    | MW149041       |
| <i>Cameraria ohridella</i>      | U1 snRNA    | MW149042       |
| <i>Yponomeuta evonymella</i>    | U1 snRNA    | MW149043       |
| <i>Cydia pomonella</i>          | U1 snRNA    | MW149044       |
| <i>Ephestia kuehniella</i>      | U1 snRNA    | MW149045       |
| <i>Bombyx mori</i>              | U1 snRNA    | MW149046       |
| <i>Glyphotaelius pellucidus</i> | U2 snRNA    | MW194851       |
| <i>Hepialus humuli</i>          | U2 snRNA    | MW194852       |
| <i>Tischeria ekebladella</i>    | U2 snRNA    | MW194853       |
| <i>Tineola bisselliella</i>     | U2 snRNA    | MW194854       |
| <i>Taleporia tubulosa</i>       | U2 snRNA    | MW194855       |
| <i>Cameraria ohridella</i>      | U2 snRNA    | MW194856       |
| <i>Yponomeuta evonymella</i>    | U2 snRNA    | MW194857       |
| <i>Cydia pomonella</i>          | U2 snRNA    | MW194858       |
| <i>Ephestia kuehniella</i>      | U2 snRNA    | MW194859       |
| <i>Bombyx mori</i>              | U2 snRNA    | MW194860       |
| <i>Glyphotaelius pellucidus</i> | 5S rDNA     | MW194861       |
| <i>Hepialus humuli</i>          | 5S rDNA     | MW194862       |
| <i>Tischeria ekebladella</i>    | 5S rDNA     | MW194863       |
| <i>Tineola bisselliella</i>     | 5S rDNA     | MW194864       |
| <i>Taleporia tubulosa</i>       | 5S rDNA     | MW194865       |
| <i>Cameraria ohridella</i>      | 5S rDNA     | MW194866       |
| <i>Yponomeuta evonymella</i>    | 5S rDNA     | MW194867       |
| <i>Cydia pomonella</i>          | 5S rDNA     | MW194868       |
| <i>Ephestia kuehniella</i>      | 5S rDNA     | MW194869       |
| <i>Bombyx mori</i>              | 5S rDNA     | MW194870       |
| <i>Phalera bucephala</i>        | histone H3  | MW558903       |
| <i>Aglais urticae</i>           | histone H3  | MW558904       |
| <i>Cossus cossus</i>            | histone H3  | MW558905       |
| <i>Yponomeuta evonymella</i>    | histone H3  | MW558906       |
| <i>Depressaria daucella</i>     | histone H3  | MW558907       |
| <i>Spodoptera frugiperda</i>    | histone H3  | MW558908       |
| <i>Tuta absoluta</i>            | histone H3  | MW558909       |
| <i>Plutella xylostella</i>      | histone H3  | MW558910       |
| <i>Abraxas grossulariata</i>    | histone H3  | MW558911       |
| <i>Euthrix potatoria</i>        | histone H3  | MW558912       |
| <i>Biston betularia</i>         | histone H3  | MW558913       |
| <i>Tischeria ekebladella</i>    | histone H3  | MW558914       |
| <i>Glyphotaelius pellucidus</i> | histone H3  | MW558915       |
| <i>Hepialus humuli</i>          | histone H3  | MW558916       |
| <i>Pieris rapae</i>             | histone H3  | MW558917       |
| <i>Cameraria ohridella</i>      | histone H3  | MW558918       |
| <i>Hyalophora cecropia</i>      | histone H3  | MW558919       |
| <i>Inachis io</i>               | histone H3  | MW558920       |



|                               |            |          |
|-------------------------------|------------|----------|
| <i>Epeestia kuehniella</i>    | histone H3 | MW558921 |
| <i>Gonepteryx rhamni</i>      | histone H3 | MW558922 |
| <i>Tineola bisselliella</i>   | histone H3 | MW558923 |
| <i>Limnaecia phragmitella</i> | histone H3 | MW558924 |
| <i>Cerura vinula</i>          | histone H3 | MW558925 |
| <i>Taleporia tubulosa</i>     | histone H3 | MW558926 |
| <i>Cydia pomonella</i>        | histone H3 | MW558927 |
| <i>Proutia betulina</i>       | histone H3 | MW558928 |
| <i>Bombyx mori</i>            | histone H3 | MW558929 |

---

**Supplementary table 2:** Overview of results from this study and from literature.

| Species                                 | Classification             | 18S rDNA                      | Histone H3                 | 5S rRNA      | 2n (F/M)                | Karyotype – ref. <sup>d</sup> | 18S rDNA – ref. <sup>d</sup> | Histone H3 – ref. <sup>d</sup> |
|-----------------------------------------|----------------------------|-------------------------------|----------------------------|--------------|-------------------------|-------------------------------|------------------------------|--------------------------------|
| <i>Glyphotaelius pellucidus</i>         | Trichoptera, Limnephilidae | 1 terminal                    | 1 terminal on 3 bivalents  | interstitial | 59/60                   | [1]                           | this study                   | this study                     |
| <i>Phymatopus californicus</i>          | Hepialidae                 | 2 terminal                    | 1 interstitial             | not analysed | unknown                 |                               | this study                   | this study                     |
| <i>Hepialus humuli</i>                  | Hepialidae                 | 1 terminal                    | 1 interstitial             | interstitial | unknown                 |                               | this study                   | this study                     |
| <i>Tischeria ekebladella</i>            | Tischeridae                | 1 terminal                    | 1 terminal                 | interstitial | 46                      | [2]                           | this study                   | this study                     |
| <i>Taleporia tubulosa</i>               | Psychidae                  | 3 interstitial on 1 bivalent  | 1 interstitial             | interstitial | 59/60                   | [3]                           | this study                   | this study                     |
| <i>Proutia betulina</i>                 | Psychidae                  | 2 terminal on 2 bivalents     | 1 interstitial             | not analysed | 61/62                   | [4]                           | this study                   | this study                     |
| <i>Psyche crassiorella</i>              | Psychidae                  | 1 terminal on 4 bivalents     | 1 interstitial             | not analysed | 61/62                   | [5]                           | this study                   | this study                     |
| <i>Tineola bisselliella</i>             | Tineidae                   | 1 terminal                    | 1 interstitial             | not detected | 59/60                   | [6]                           | this study                   | this study                     |
| <i>Cameraria ohridella</i>              | Gracillariidae             | 1 terminal                    | 1 interstitial             | not detected | 60                      | [7]                           | this study                   | this study                     |
| <i>Plutela xylostella</i>               | Plutellidae                | 1 terminal                    | 1 terminal                 | not analysed | 62                      | [8]                           | this study                   | this study                     |
| <i>Yponomeuta evonymella</i>            | Yponomeutidae              | 1 terminal on 2 bivalents     | 1 terminal                 | not detected | 61/62                   | [9]                           | this study                   | this study                     |
| <i>Cydia pomonella</i>                  | Tortricidae                | 2 terminal on 1 bivalent      | 1 interstitial             | not detected | 56                      | [10,11]                       | [11], this study             | [12], this study               |
| <i>Zeiraphera griseana (Z. diniana)</i> | Tortricidae                | 1 interstitial                | not analysed               | not analysed | 56                      | Marec unpublished             | Marec unpublished            |                                |
| <i>Grapholita molesta</i>               | Tortricidae                | 1 terminal                    | 1 interstitial             | not analysed | 56                      | [12]                          | [12]                         | [12]                           |
| <i>Grapholita funebrana</i>             | Tortricidae                | 1 interstitial                | 1 interstitial             | not analysed | 56                      | [12]                          | [12]                         | [12]                           |
| <i>Lobesia botrana</i>                  | Tortricidae                | 1 interstitial                | 1 interstitial             | not analysed | 56                      | [12]                          | [12]                         | [12]                           |
| <i>Eupoecilia ambiguella</i>            | Tortricidae                | 1 terminal on 1 bivalent (ZW) | 1 interstitial             | not analysed | 60                      | [12]                          | [12]                         | [12]                           |
| <i>Cossus cossus</i>                    | Cossidae                   | 1 interstitial                | 1 terminal                 | not analysed | 60 <sup>a</sup>         | this study                    | this study                   | this study                     |
| <i>Leptidea amurensis</i>               | Pieridae                   | 1 terminal                    | 1 terminal, 1 interstitial | not analysed | 2n=118-122 <sup>b</sup> | [13]                          | [13]                         | [13]                           |
| <i>Leptidea juvernica</i>               | Pieridae                   | 1 interstitial                | 3-4 variable loci          | not analysed | 2n=80-91 <sup>b</sup>   | [14]                          | [14]                         | [14]                           |
| <i>Leptidea reali</i>                   | Pieridae                   | 1 terminal                    | 1 interstitial             | not analysed | 2n=51-55 <sup>b</sup>   | [14]                          | [14]                         | [14]                           |
| <i>Leptidea sinapis</i>                 | Pieridae                   | 2 loci - variable positions   | 1-2 variable loci          | not analysed | 2n=56-106 <sup>b</sup>  | [14]                          | [14]                         | [14]                           |
| <i>Pieris brassicae</i>                 | Pieridae                   | 1 terminal                    | 1 terminal                 | not analysed | 30                      | [15]                          | [16], this study             | this study                     |

|                                |              |                                                      |                          |              |         |                   |                               |            |
|--------------------------------|--------------|------------------------------------------------------|--------------------------|--------------|---------|-------------------|-------------------------------|------------|
| <i>Pieris rapae</i>            | Pieridae     | 1 terminal                                           | 1 terminal               | not analysed | 50      | [ <sup>15</sup> ] | [ <sup>16</sup> ], this study | this study |
| <i>Gonepteryx rhamni</i>       | Pieridae     | 1 terminal                                           | 1 terminal               | not analysed | 62      | [ <sup>15</sup> ] | this study                    | this study |
| <i>Colias hyale</i>            | Pieridae     | 1 interstitial on 4 bivalents                        | not analysed             | not analysed | 62      | [ <sup>16</sup> ] | [ <sup>16</sup> ]             |            |
| <i>Polyommatus icarus</i>      | Lycaenidae   | 1 interstitial                                       | not analysed             | not analysed | 46      | [ <sup>16</sup> ] | [ <sup>16</sup> ]             |            |
| <i>Inachis io</i>              | Nymphalidae  | 2 terminal on 4 bivalents, 1 terminal on 3 bivalents | 1 interstitial           | not analysed | 62      | [ <sup>15</sup> ] | [ <sup>16</sup> ], this study | this study |
| <i>Aglais urticae</i>          | Nymphalidae  | 2 terminal on 1 bivalent, 1 terminal on 5 bivalents  | 1 interstitial           | not analysed | 62      | [ <sup>15</sup> ] | this study                    | this study |
| <i>Nymphalis xanthomelas</i>   | Nymphalidae  | 1 terminal on two bivalents                          | not analysed             | not analysed | 62      | [ <sup>16</sup> ] | [ <sup>16</sup> ]             |            |
| <i>Bicyclus anynana</i>        | Nymphalidae  | 1 terminal + 1 NOR, unknown position                 | not analysed             | not analysed | 56      | [ <sup>17</sup> ] | [ <sup>17</sup> ]             |            |
| <i>Depressaria daucella</i>    | Gelechiidae  | 1 interstitial                                       | 1 interstitial           | not analysed | 60      | [ <sup>18</sup> ] | this study                    | this study |
| <i>Limnecia phragmitella</i>   | Gelechiidae  | 1 terminal                                           | 1 interstitial           | not analysed | unknown |                   | this study                    | this study |
| <i>Tuta absoluta</i>           | Gelechiidae  | 1 terminal on 2 bivalents                            | 2 terminal on 1 bivalent | not analysed | 58      | [ <sup>19</sup> ] | this study                    | this study |
| <i>Pectinop gossypiella</i>    | Gelechiidae  | 1 interstitial                                       | not analysed             | not analysed | 60      | [ <sup>20</sup> ] | [ <sup>20</sup> ]             |            |
| <i>Ectomyelois ceratoniae</i>  | Pyralidae    | 1 terminal, 1 interstitial                           | not analysed             | not analysed | 62      | [ <sup>21</sup> ] | [ <sup>21</sup> ]             |            |
| <i>Ostrinia nubilalis</i>      | Pyralidae    | 1 terminal on 5 bivalents                            | not analysed             | not analysed | 62      | [ <sup>16</sup> ] | [ <sup>16</sup> ]             |            |
| <i>Ephestia kuehniella</i>     | Pyralidae    | 1 terminal on 2 bivalents                            | 1 interstitial           | not detected | 60      | [ <sup>22</sup> ] | [ <sup>16,23</sup> ]          | this study |
| <i>Cerura vinula</i>           | Notodontidae | 1 terminal on 2 bivalents                            | 1 interstitial           | not analysed | 42      | [ <sup>15</sup> ] | this study                    | this study |
| <i>Phalera bucephala</i>       | Notodontidae | 1 terminal on 2 bivalents                            | 1 interstitial           | not analysed | 60      | [ <sup>15</sup> ] | this study                    | this study |
| <i>Spodoptera frugiperda</i>   | Noctuidae    | 1 interstitial (autosome 11)                         | 1 interstitial           | not analysed | 62      | this study        | this study                    | this study |
| <i>Mamestra brassicae</i>      | Noctuidae    | 1 interstitial                                       | not analysed             | not analysed | 62      | [ <sup>16</sup> ] | [ <sup>16</sup> ]             |            |
| <i>Phragmatobia fuliginosa</i> | Erebidae     | 1 interstitial                                       | not analysed             | not analysed | 58      | [ <sup>24</sup> ] | [ <sup>24</sup> ]             |            |
| <i>Arctia caja</i>             | Erebidae     | 1 interstitial                                       | not analysed             | not analysed | 62      | [ <sup>16</sup> ] | [ <sup>16</sup> ]             |            |
| <i>Lymantria dispar</i>        | Erebidae     | 1 interstitial                                       | not analysed             | not analysed | 62      | [ <sup>25</sup> ] | [ <sup>16</sup> ]             |            |
| <i>Orgyia recens</i>           | Erebidae     | 1 interstitial                                       | not analysed             | not analysed | 60      | [ <sup>16</sup> ] | [ <sup>16</sup> ]             |            |

|                              |             |                               |                                                    |              |                    |                   |                   |            |
|------------------------------|-------------|-------------------------------|----------------------------------------------------|--------------|--------------------|-------------------|-------------------|------------|
| <i>Orgyia leucostigma</i>    | Erebidae    | 1 interstitial                | not analysed                                       | not analysed | 56                 | [ <sup>16</sup> ] | [ <sup>16</sup> ] |            |
| <i>Orgyia antiqua</i>        | Erebidae    | 1 interstitial                | not analysed                                       | not analysed | 28                 | [ <sup>26</sup> ] | [ <sup>16</sup> ] |            |
| <i>Orgyia thyellina</i>      | Erebidae    | 1 interstitial                | not analysed                                       | not analysed | 22                 | [ <sup>27</sup> ] | [ <sup>27</sup> ] |            |
| <i>Biston betularia</i>      | Geometridae | 1 terminal on 3 bivalents     | 1 interstitial                                     | not analysed | 62                 | [ <sup>28</sup> ] |                   | this study |
| <i>Abraxas grossulariata</i> | Geometridae | 1 terminal on 1 bivalent (ZW) | 1 interstitial                                     | not analysed | 56                 | [ <sup>29</sup> ] | [ <sup>29</sup> ] | this study |
| <i>Abraxas sylvata</i>       | Geometridae | 1 terminal on 1 bivalent (ZW) | not analysed                                       | not analysed | 58                 | [ <sup>29</sup> ] | [ <sup>29</sup> ] |            |
| <i>Euthrix potatoria</i>     | Bombycidae  | 2 interstitial on 1 bivalent  | 1 interstitial                                     | not analysed | 62                 | [ <sup>15</sup> ] |                   | this study |
| <i>Bombyx mori</i>           | Bombycidae  | 1 interstitial (autosome 11)  | 1 interstitial                                     | not detected | 56                 | [ <sup>15</sup> ] | [ <sup>30</sup> ] | this study |
| <i>Manduca sexta</i>         | Sphingidae  | 1 interstitial                | not analysed                                       | not analysed | 56                 | [ <sup>31</sup> ] | [ <sup>16</sup> ] |            |
| <i>Antheraea yamamai</i>     | Saturniidae | 1 terminal on 2 bivalents     | not analysed                                       | not analysed | 62                 | [ <sup>32</sup> ] | [ <sup>32</sup> ] |            |
| <i>Antheraea pernyi</i>      | Saturniidae | 1 terminal                    | not analysed                                       | not analysed | 98                 | [ <sup>16</sup> ] | [ <sup>16</sup> ] |            |
| <i>Samia cynthia ssp.</i>    | Saturniidae | 1 interstitial                | not analysed                                       | not analysed | 25-28 <sup>c</sup> | [ <sup>32</sup> ] | [ <sup>32</sup> ] |            |
| <i>Hyalophora cecropia</i>   | Saturniidae | 1 terminal on 3 bivalents     | 2 terminal on 1 bivalent, 1 terminal on 1 bivalent | not analysed | 62                 | [ <sup>33</sup> ] |                   | this study |

<sup>a</sup> preliminary diploid chromosome number determined only in male, female unknown

<sup>b</sup> variable

<sup>c</sup> chromosome numbers differ in subspecies (2n = 25/26 in *S. c. sp. indet.*; 2n = 26 in *S. c. walkeri*; 2n = 27/28 in *S. c. ricini*)

- <sup>d</sup> 1. Kiauta, B. & Lankhorst, L. The chromosomes of the caddis-fly, *Glyphotaelius pellucidus* (Retzius, 1783) (Trichoptera: Limnephilidae, limnephilinae). *Genetica* **40**, 1–6 (1969).
2. Lukhtanov, V. A. Sex chromatin and sex chromosome systems in nonditrysian Lepidoptera (Insecta). *J. Zool. Syst. Evol. Res.* **38**, 73–79 (2000).
3. Seiler, J. Research on the sex-chromosomes of Psychidae (Lepidoptera). *Biol. Bull.* **36**, 399–404 (1919).
4. Hejníčková, M. *et al.* Absence of W chromosome in Psychidae moths and implications for the theory of sex chromosome evolution in Lepidoptera. *Genes* **10**, 1016; [10.3390/genes10121016](https://doi.org/10.3390/genes10121016) (2019).
5. Seiler, J. Geschlechtschromosomen-Untersuchungen an Psychiden. *Z. Indukt. Abstamm. Vererbungsl.* **31**, 1–99 (1922).
6. Dalíková, M. *et al.* New insights into the evolution of the W chromosome in Lepidoptera. *J. Hered.* **108**, 709–719 (2017).
7. Prins, J. D., Prins, W. D. & Dall'Asta, U. The karyotype of *Cameraria ohridella* (Lepidoptera: Gracillariidae). *Phegea* **301**, 5–10 (2002).
8. Yasukochi, Y. *et al.* Extensive conserved synteny of genes between the karyotypes of *Manduca sexta* and *Bombyx mori* revealed by BAC-FISH mapping. *PLoS ONE* **4**, e7465; [10.1371/journal.pone.0007465](https://doi.org/10.1371/journal.pone.0007465) (2009).

9. Nilsson, N.-O., Löfstedt, C. & Dävring, L. Unusual sex chromosome inheritance in six species of small ermine moths (Yponomeuta, Yponomeutidae, Lepidoptera). *Hereditas* **108**, 259–265 (1988).
10. Ortiz, E. & Templado, J. Los cromosomas de tres especies de tortricidos (Lep. Tortricidae). *EOS-Rev. Esp. Entomol.* **51**, 77–84 (1976).
11. Fuková, I., Nguyen, P. & Marec, F. Codling moth cytogenetics: karyotype, chromosomal location of rDNA, and molecular differentiation of sex chromosomes. *Genome* **48**, 1083–1092 (2005).
12. Šichová, J., Nguyen, P., Dalíková, M. & Marec, F. Chromosomal evolution in tortricid moths: Conserved karyotypes with diverged features. *PLoS ONE* **8**, e64520; [10.1371/journal.pone.0064520](https://doi.org/10.1371/journal.pone.0064520) (2013).
13. Šichová, J. *et al.* Fissions, fusions, and translocations shaped the karyotype and multiple sex chromosome constitution of the northeast-Asian wood white butterfly, *Leptidea amurensis*. *Biol. J. Linn. Soc.* **118**, 457–471 (2016).
14. Šichová, J. *et al.* Dynamic karyotype evolution and unique sex determination systems in Leptidea wood white butterflies. *BMC Evol Biol* **15**, 89; [10.1186/s12862-015-0375-4](https://doi.org/10.1186/s12862-015-0375-4) (2015).
15. Robinson, R. *Lepidoptera Genetics*. (Pergamon Press, 1971).
16. Nguyen, P., Sahara, K., Yoshido, A. & Marec, F. Evolutionary dynamics of rDNA clusters on chromosomes of moths and butterflies (Lepidoptera). *Genetica* **138**, 343–354 (2010).
17. Van't Hof, A. E., Marec, F., Saccheri, I. J., Brakefield, P. M. & Zwaan, B. J. Cytogenetic characterization and AFLP-based genetic linkage mapping for the butterfly *Bicyclus anynana*, covering all 28 karyotyped chromosomes. *PLoS ONE* **3**, e3882; [10.1371/journal.pone.0003882](https://doi.org/10.1371/journal.pone.0003882) (2008).
18. Carabajal Paladino, L. Z. *et al.* Sex chromosome turnover in moths of the diverse superfamily Gelechioidea. *Genome Biol. Evol.* **11**, 1307–1319 (2019).
19. Carabajal Paladino, L. Z. *et al.* The effect of X-rays on cytological traits of *Tuta absoluta* (Lepidoptera: Gelechiidae). *Fla. Entomol.* **99**, 43–53 (2016).
20. Bartlett, A. & Del Fosse, F. The pachytene karyotype of the pink bollworm (Lepidoptera: Gelechiidae). *Southwest Entomol.* **16**, 223–235 (1991).
21. Mediouni, J., Fuková, I., Frydrychová, R., Dhoubi, M. H. & Marec, F. Karyotype, sex chromatin and sex chromosome differentiation in the carob moth, *Ectomyelois ceratoniae* (Lepidoptera: Pyralidae). *Caryologia* **57**, 184–194 (2004).
22. Schulz, H.-J. & Traut, W. The pachytene complement of the wildtype and a chromosome mutant strain of the flour moth, *Ephesia kuehniella* (Lepidoptera). *Genetica* **50**, 61–66 (1979).
23. Marec, F. & Traut, W. Synaptonemal complexes in female and male meiotic prophase of *Ephesia kuehniella* (Lepidoptera). *Heredity* **71**, 394–404 (1993).
24. Traut, W. & Marec, F. Sex chromosome differentiation in some species of Lepidoptera (Insecta). *Chromosome Res.* **5**, 283–291 (1997).
25. Krider, H. & Shields, K. Meiosis in North American and Asian races of gypsy moth (Lepidoptera: Lymantriidae) and their hybrids. *Ann. Entomol. Soc. Am.* **90**, 223–229 (1997).
26. Traut, W. & Clarke, C. A. Karyotype evolution by chromosome fusion in the moth Genus *Orgyia*. *Hereditas* **126**, 77–84 (1997).
27. Traut, W. & Clarke, C. A. Cytogenetics of a moth species with a low chromosome number, *Orgyia Thyllina*. *Hereditas* **125**, 277–283 (1996).
28. Van't Hof, A. E. *et al.* Linkage map of the peppered moth, *Biston betularia* (Lepidoptera, Geometridae): a model of industrial melanism. *Heredity* **110**, 283–295 (2013).
29. Zrzavá, M. *et al.* Sex chromosomes of the iconic moth *Abraxas grossulariata* (Lepidoptera, Geometridae) and its congener *A. sylvata*. *Genes* **9**, 279; [10.3390/genes9060279](https://doi.org/10.3390/genes9060279) (2018).
30. Yoshido, A., Bando, H., Yasukochi, Y. & Sahara, K. The *Bombyx mori* karyotype and the assignment of linkage groups. *Genetics* **170**, 675–685 (2005).



31. Sahara, K. *et al.* Conserved synteny of genes between chromosome 15 of *Bombyx mori* and a chromosome of *Manduca sexta* shown by five-color BAC-FISH. *Genome* **50**, 1061–1065 (2007).
32. Yoshido, A., Marec, F. & Sahara, K. Resolution of sex chromosome constitution by genomic in situ hybridization and fluorescence in situ hybridization with (TTAGG)<sub>n</sub> telomeric probe in some species of Lepidoptera. *Chromosoma* **114**, 193–202 (2005).
33. Bytinski-Salz, H. Untersuchungen an Lepidopteren-hybriden V. Die Verwandtschaft der Platysamia Arten (Lepidoptera, Saturniidae) nach untersuchungen iiber die Fertilitat und die chromosomen Verhatnisse ihrer Bastarde. *Arch. Exp. Zellforsch* 217–237 (1938).

**Supplementary Table 3:** Overview of the results from qPCR experiments.

| Species                          | Target gene | Target gene to reference ratio ( <i>R</i> ) |           |            | $E_{\text{Reference}}$ | $E_{\text{Target}}$ | mean    | ± S.D. |
|----------------------------------|-------------|---------------------------------------------|-----------|------------|------------------------|---------------------|---------|--------|
|                                  |             | sample I                                    | sample II | sample III |                        |                     |         |        |
| <i>Glyphotaellius pellucidus</i> | 5S rRNA     | 53.322                                      | 61.585    | 46.555     | 0.82                   | 0.813               | 53.821  | 7.527  |
|                                  | U1 snRNA    | 5.301                                       | 4.421     | 5.101      | 0.82                   | 0.79                | 4.941   | 0.462  |
|                                  | U2 snRNA    | 7.835                                       | 8.025     | 6.683      | 0.82                   | 0.759               | 7.514   | 0.726  |
| <i>Hepialus humuli</i>           | 5S rRNA     | 232.102                                     | 317.306   | 242.304    | 0.937                  | 0.985               | 263.904 | 46.528 |
|                                  | U1 snRNA    | 20.641                                      | 24.78     | 23.32      | 0.769                  | 0.83                | 22.914  | 2.099  |
|                                  | U2 snRNA    | 19.577                                      | 15.064    | 15.693     | 0.769                  | 0.84                | 16.778  | 2.444  |
| <i>Tischeria ekebladella</i>     | 5S rRNA     | 18.445                                      | 18.81     | 22.522     | 0.822                  | 0.891               | 19.926  | 2.255  |
|                                  | U1 snRNA    | 3.138                                       | 1.691     | 1.539      | 0.822                  | 0.863               | 2.123   | 0.884  |
|                                  | U2 snRNA    | 3.246                                       | 2.998     | 3.121      | 0.822                  | 0.817               | 3.122   | 0.124  |
| <i>Tineolla bisselliella</i>     | 5S rRNA     | 12.917                                      | 14.8      | 16.227     | 0.978                  | 0.972               | 14.648  | 1.661  |
|                                  | U1 snRNA    | 2.336                                       | 2.653     | 2.279      | 0.978                  | 1.006               | 2.423   | 0.202  |
|                                  | U2 snRNA    | 0.509                                       | 0.899     | 1.57       | 0.978                  | 0.927               | 0.993   | 0.537  |
| <i>Taleporia tubulosa</i>        | 5S rRNA     | 50.283                                      | 54.301    | 49.178     | 1.01                   | 1.02                | 51.254  | 2.696  |
|                                  | U1 snRNA    | 10.512                                      | 11.272    | 11.654     | 1.01                   | 0.992               | 11.146  | 0.581  |
|                                  | U2 snRNA    | 54.614                                      | 45.474    | 67.531     | 1.01                   | 1.09                | 55.873  | 11.083 |
| <i>Cameraria ohridella</i>       | 5S rRNA     | 40.296                                      | 35.272    | 39.842     | 0.55                   | 0.759               | 38.469  | 2.779  |
|                                  | U1 snRNA    | 4.088                                       | 4.135     | 4.365      | 0.855                  | 0.886               | 4.196   | 0.148  |
|                                  | U2 snRNA    | 8.946                                       | 8.772     | 10.179     | 0.855                  | 0.684               | 9.299   | 0.768  |
| <i>Yponomeuta evonymella</i>     | 5S rRNA     | 6.121                                       | 5.875     | 6.012      | 0.89                   | 0.971               | 6.003   | 0.123  |
|                                  | U1 snRNA    | 3.205                                       | 2.686     | 3.023      | 0.89                   | 0.971               | 2.971   | 0.263  |
|                                  | U2 snRNA    | 3.566                                       | 3.171     | 3.613      | 0.89                   | 0.928               | 3.449   | 0.243  |
| <i>Cydia pomonella</i>           | 5S rRNA     | 9.932                                       | 14.56     | 15.362     | 0.903                  | 0.928               | 13.285  | 2.931  |
|                                  | U1 snRNA    | 8.446                                       | 6.088     | 6.553      | 0.903                  | 0.95                | 7.029   | 1.249  |
|                                  | U2 snRNA    | 21.848                                      | 20.913    | 21.931     | 0.903                  | 0.843               | 21.564  | 0.565  |
| <i>Epehstia kuehniella</i>       | 5S rRNA     | 17.019                                      | 17.518    | 16.534     | 0.984                  | 1.046               | 17.024  | 0.491  |
|                                  | U1 snRNA    | 9.818                                       | 9.229     | 10.129     | 0.984                  | 0.932               | 9.726   | 0.457  |
|                                  | U2 snRNA    | 9.409                                       | 9.833     | 10.527     | 1.006                  | 0.935               | 9.923   | 0.565  |
| <i>Bombyx mori</i>               | 5S rRNA     | 128.698                                     | 127.215   | 95.408     | 1.025                  | 1.027               | 117.107 | 18.806 |
|                                  | U1 snRNA    | 27.288                                      | 33.625    | 34.646     | 1.001                  | 0.889               | 31.853  | 3.986  |
|                                  | U2 snRNA    | 10.781                                      | 13.184    | 2.158      | 1.001                  | 1.002               | 12.041  | 1.206  |

**Supplementary table S4:** List of primers used for PCR amplification of marker genes.

| Gene       | Forward primer          | Reverse primer       | Product length [bp] | Annealing temp. [°C] | Reference <sup>a</sup> |
|------------|-------------------------|----------------------|---------------------|----------------------|------------------------|
| 18 S rDNA  | CGATACCGCGAATGGCTCAA    | ACAAAGGGCAGGGACG     | 1850                | 58                   | [1]                    |
| Histone H3 | ATGGCNCGTACNAARCARAC    | TANGCACGYTCNCCNCGGAT | 300–500             | 62                   | [2]                    |
| 5S rDNA    | GCCAACGTCCATACCAAYGYTGA | AAGCCAACGNACGYGGT    | 120                 | 58                   | This study             |
| U1 snRNA   | CAAAAATTACGCGTCCGAG     | CGTAGGGGACACCGTGAT   | 120                 | 58                   | This study             |
| U2 snRNA   | AGATCAAAGTGTAGTATCTGTTC | CTGCAATGCCGGGCCRAC   | 140                 | 58                   | This study             |

<sup>a</sup> 1. Fuková, I., Nguyen, P. & Marec, F. Codling moth cytogenetics: karyotype, chromosomal location of rDNA, and molecular differentiation of sex chromosomes. *Genome* **48**, 1083–1092; (2005).

2. Šichová, J., Nguyen, P., Dalíková, M. & Marec, F. Chromosomal evolution in tortricid moths: Conserved karyotypes with diverged features. *PLoS One* **8**, e64520; [10.1371/journal.pone.0064520](https://doi.org/10.1371/journal.pone.0064520) (2013).

**Supplementary table S5:** List of species examined.

| Superfamily                     | Species                                    | Origin                                    | Rearing conditions, diet                                              |
|---------------------------------|--------------------------------------------|-------------------------------------------|-----------------------------------------------------------------------|
| Limnephiloidea<br>(Trichoptera) | <i>Glyphotaelius pellucidus</i>            | Znojmo, CZ                                | fresh water, 15°C, <i>Fagus</i> sp.                                   |
| Hepialoidea                     | <i>Phymatopus californicus</i>             | Bodega Marine Reserve,<br>California, USA | 15°C, <i>Daucus carota</i>                                            |
| Tischerioidea                   | <i>Hepialus humuli</i>                     | Bochov, Czech Republic                    | outdoor container with planted <i>Daucus carota</i>                   |
| Tineoidea                       | <i>Tischeria ekebladella</i> <sup>a</sup>  | České Budějovice, CZ                      | ambient conditions, <i>Quercus</i> sp.                                |
|                                 | <i>Taleporia tubulosa</i> <sup>a</sup>     | České Budějovice, CZ                      | ambient conditions                                                    |
|                                 | <i>Proutia betulina</i> <sup>a</sup>       | České Budějovice, CZ                      | ambient conditions                                                    |
|                                 | <i>Psyche crassiorella</i> <sup>a</sup>    | České Budějovice, CZ                      | ambient conditions                                                    |
|                                 | <i>Tineola bisselliella</i>                | České Budějovice, CZ                      | 25 ± 1°C, 16/8 h (light/dark) regime, wool                            |
| Gracillarioidea                 | <i>Cameraria ohridella</i> <sup>a</sup>    | České Budějovice, CZ                      | ambient conditions, <i>Aesculus hippocastanum</i>                     |
| Yponomeutoidea                  | <i>Plutella xylostella</i>                 | Laboratory strain                         | 25 ± 1°C, 16/8 h (light/dark) regime, artificial diet [1]             |
|                                 | <i>Yponomeuta evonymella</i>               | Amsterdam, NL                             | ambient conditions, <i>Prunus padus</i>                               |
| Tortricoidea                    | <i>Cydia pomonella</i>                     | Laboratory strain Krym-61                 | 27±1 °C ; 16/8 h (light/dark) regime, artificial diet [2]             |
| Cossoidea                       | <i>Cossus cossus</i> <sup>a</sup>          | České Budějovice, CZ                      | ambient conditions                                                    |
| Papilionoidea                   | <i>Pieris brassicae</i>                    | Levín, CZ                                 | ambient conditions, <i>Brassica napus</i>                             |
|                                 | <i>Pieris rapae</i>                        | Levín, CZ                                 | ambient conditions, <i>Brassica oleracea</i>                          |
|                                 | <i>Gonepteryx rhamni</i> <sup>a</sup>      | Levín and České Budějovice, CZ            | ambient conditions                                                    |
|                                 | <i>Inachis io</i>                          | Vrábče, CZ                                | ambient conditions, <i>Urtica dioica</i>                              |
|                                 | <i>Aglais urticae</i>                      | Vrábče, CZ                                | ambient conditions, <i>Urtica dioica</i>                              |
| Gelechioidea                    | <i>Depressaria daucella</i> <sup>a</sup>   | Tábor, CZ                                 | ambient conditions, <i>Carum</i> sp.                                  |
|                                 | <i>Limnaecia phragmitella</i> <sup>a</sup> | České Budějovice, CZ                      | ambient conditions, <i>Typha</i> sp.                                  |
|                                 | <i>Tuta absoluta</i>                       | Laboratory strain                         | 25 ± 1°C, 16/8 h (light/dark) regime, <i>Solanum lycopersicum</i> [3] |
| Pyraloidea                      | <i>Ephestia kuehniella</i>                 | Laboratory strain WT-C02                  | 25 ± 1°C, 16/8 h (light/dark) regime, artificial diet [4]             |
| Noctuoidea                      | <i>Cerura vinula</i>                       | Chrudim, CZ                               | ambient conditions, <i>Salix alba</i>                                 |
|                                 | <i>Phalera bucephala</i> <sup>a</sup>      | České Budějovice, CZ                      |                                                                       |
|                                 | <i>Spodoptera frugiperda</i>               | Laboratory of Heckel D, Jena, DE          | 25 ± 1°C, 16/8 h (light/dark) regime, artificial diet [5]             |
| Geometroidea                    | <i>Biston betularia</i>                    | Laboratory of Saccheri I, Liverpool, UK   | ambient conditions, <i>Betula pendula</i> and <i>Malus domestica</i>  |
|                                 | <i>Abraxas grossulariata</i>               | Near Hrabětice, CZ                        | Ambient conditions, <i>Ribes rubrum</i> [6]                           |
| Bombycoidea                     | <i>Euthrix potatoria</i>                   | Sedlec, CZ                                | ambient conditions, <i>Poaceae</i>                                    |
|                                 | <i>Bombyx mori</i>                         | Laboratory strain p50                     | ambient conditions, <i>Morus</i> sp.                                  |
|                                 | <i>Hyalophora cecropia</i>                 | Connecticut, USA                          | ambient conditions, <i>Acer platanoides</i>                           |

<sup>a</sup> Individuals processed immediately after collection

1. details in Shelton, A.M. *et al.* Comparative analysis of two rearing procedures for diamondback moth (Lepidoptera: Plutellidae). *J. Entomol. Sci.* **26**, 17–26 (1991).
2. details in Fuková, I., Nguyen, P. & Marec, F. Codling moth cytogenetics: karyotype, chromosomal location of rDNA, and molecular differentiation of sex chromosomes. *Genome* **48**, 1083–1092 (2005).
3. Cagnotti, C.L. *et al.* Effects of X-rays on *Tuta absoluta* for use in inherited sterility programmes. *J. Pest Sci.* **85**, 413–421 (2012).
4. Marec, F. Genetic control of pest Lepidoptera: induction of sex-linked recessive lethal mutations in *Ephestia kuehniella* (Pyrallidae). *Acta Entomol. Bohemoslov.* **87**, 445–458(1990)
5. Kost, S. *et al.* A Z-linked sterility locus causes sexual abstinence in hybrid females and facilitates speciation in *Spodoptera frugiperda*. *Evolution* **70**, 1418–1427 (2016).
6. Zrzavá, M. *et al.* Sex chromosomes of the iconic moth *Abraxas grossulariata* (Lepidoptera, Geometridae) and its congener *A. sylvata*. *Genes* **9**, 279; [10.3390/genes9060279](https://doi.org/10.3390/genes9060279) (2018).

**Supplementary Table 6:** Primers and their concentrations used in the qPCR experiments.

| Species                        | Gene                          | Forward                    | Reverse                   | Reference <sup>a</sup> | Final conc. |
|--------------------------------|-------------------------------|----------------------------|---------------------------|------------------------|-------------|
| <i>Glyphotaelius pelucidus</i> | <i>Acetylcholinesterase 2</i> | CCCCGGATTCGAAGGAGAAG       | ATCCGCCGCCATAAATCCAA      | this study             | 0,8 µM      |
|                                | <i>U1 snRNA</i>               | TAGGGAAAAATCGCAAGGGTCAG    | GTAGGGGACACCGTGATCAAT     | this study             | 0,8 µM      |
|                                | <i>U2 snRNA</i>               | GTGGAGCAAGCCCCGAACATC      | GCAATGCGGGACCAGTATATT     | this study             | 0,8 µM      |
|                                | <i>5S rDNA</i>                | GCCAACGTCCATACCATGCTGA     | ACCGCGTGTCTGGCTT          | this study             | 0,8 µM      |
| <i>Hepialus humuli</i>         | <i>paralytic</i>              | ATCCCTTGCTCCCTAAC          | CCCACATTGCTGAGAGTGG       | [1]                    | 1,2 µM      |
|                                | <i>U1 snRNA</i>               | TAGGGAAAAATCGCAAGGGTCAG    | CCGTGATCATGAAGGCGGTA      | this study             | 0,8 µM      |
|                                | <i>U2 snRNA</i>               | GTGGAGCAAGCCCCGAACATC      | ATCTGATAGTCCCGCATTGC      | this study             | 0,8 µM      |
|                                | <i>5S rDNA</i>                | TGAAAACACCGTTCTCGTCC       | CACCCATCCAAGTACTGACCG     | this study             | 0,4 µM      |
| <i>Tischeria ekebladella</i>   | <i>Acetylcholinesterase 2</i> | GACACTATTGTGGCCTCGATG      | CCAGGAGTCTTTCACTTTGC      | [2]                    | 0,8 µM      |
|                                | <i>U1 snRNA</i>               | ATTACGCGTCCGAGATATCCA      | TTGCACTAGGGTTGGGTTGAC     | this study             | 0,8 µM      |
|                                | <i>U2 snRNA</i>               | AGCCCCTATCTCCGCATCAG       | GCTTAATATCTGAAAGTCCCGCAA  | this study             | 0,8 µM      |
|                                | <i>5S rDNA</i>                | CCCATCCAAGTACTGACCACG      | TGAATACACCGTTCTCGTCC      | this study             | 0,8 µM      |
| <i>Tineola bisselliella</i>    | <i>Acetylcholinesterase 2</i> | GAGGCACCAAAATTTCAAATACAA   | ATACGAATATTTCCAGGATTTGAGG | [2]                    | 1 µM        |
|                                | <i>U1 snRNA</i>               | GGTAATCACAGGGGTCAACC       | ATCAAGAAGGCGGTTCCCC       | this study             | 0,4 µM      |
|                                | <i>U2 snRNA</i>               | GTGGAGCAAGCCCCGAACATC      | ATCTGATAGTCCCGCATTGC      | this study             | 0,8 µM      |
|                                | <i>5S rDNA</i>                | ACCCATCCAAGTACTGACCAC      | TACACCGTTCTCGTCCGAT       | this study             | 0,8 µM      |
| <i>Taleporia tubulosa</i>      | <i>Acetylcholinesterase 2</i> | TGGCGGAAAGACCTAAGGTTT      | TACAAGTCTAGGGTTCGAGTG     | this study             | 0,4 µM      |
|                                | <i>U1 snRNA</i>               | CCCACATTAGGGGTAATCGCA      | CGTGATCACAAGGCGGTTT       | this study             | 0,4 µM      |
|                                | <i>U2 snRNA</i>               | TCAGCTTAATATCTGAAAGTCCAG   | TGGAGCGAGCCCCGAACAT       | this study             | 0,4 µM      |
|                                | <i>5S rDNA</i>                | GCGGTCACCCATCCAAGTAC       | TGAATACACCGTTCTCGTCC      | this study             | 0,4 µM      |
| <i>Cameraria ohridella</i>     | <i>Acetylcholinesterase 2</i> | TACACGGACTGGGAGGAGATAAC    | TAGTTTGTAGGGCAGATGAAGAAG  | [2]                    | 0,8 µM      |
|                                | <i>U1 snRNA</i>               | CCGTGATCAAGTAGGCGGTT       | TAGGGATAATCGCAGGGGTCA     | this study             | 0,8 µM      |
|                                | <i>U2 snRNA</i>               | CAGCTTAATATCTGAAAGTCCCTCAC | AGCCCCAACTACCCATCTAGA     | this study             | 0,8 µM      |
|                                | <i>5S rDNA</i>                | TGAAAACACCGTTCTCGTCC       | CACCCATCCAAGTACTGACCG     | this study             | 0,8 µM      |
| <i>Yponomeuta evonymella</i>   | <i>Acetylcholinesterase 2</i> | AGCTGGAGCTGTTTCTGTCTC      | CGCATAATGCTCTTCTCTTG      | this study             | 0,8 µM      |
|                                | <i>U1 snRNA</i>               | CCGTGATCAAGTAGGCGGTT       | TAGGGATAATCGCAGGGGTCA     | this study             | 0,8 µM      |
|                                | <i>U2 snRNA</i>               | GTAACGGGAGTGGAGCGAG        | CAGCTTAATATCTGAAAGTCCCC   | this study             | 0,8 µM      |
|                                | <i>5S rDNA</i>                | AGCCAACGACACGTGGTG         | TGAATACACCGTTCTCGTCC      | this study             | 0,8 µM      |
| <i>Cydia pomonella</i>         | <i>Acetylcholinesterase 2</i> | CTGCCACATTCATGCGTTCA       | ACCCAAAGCATAACAGCTGC      | this study             | 0,4 µM      |
|                                | <i>U1 snRNA</i>               | CAAAAATTACGCGTCCGAG        | CGTAGGGGACACCGTGAT        | this study             | 0,4 µM      |
|                                | <i>U2 snRNA</i>               | AGTGTAGTATCTGTTCTTTTCAGC   | CCGTGACGGGAGTGGAG         | this study             | 0,4 µM      |
|                                | <i>5S rDNA</i>                | CCAACGTCCATACCATGCTGAAT    | TCACCCATCCAAGTACTGACCT    | this study             | 0,4 µM      |



|                            |                               |                        |                           |            |        |
|----------------------------|-------------------------------|------------------------|---------------------------|------------|--------|
| <i>Ephestia kuehniella</i> | <i>Acetylcholinesterase 2</i> | CCGGCATCATCAAGACAAACC  | GTACCACTCATGTAGCCACCG     | this study | 0,4 μM |
|                            | <i>U1 snRNA</i>               | TCCGAGTTATCCACATTAGGGA | GAAGGCGGTTCCCCCAGG        | this study | 0,4 μM |
|                            | <i>U2 snRNA</i>               | GAGCGAGCCCCGAACATC     | CAGCTTAATATCTGAAAGTTCCCCC | this study | 0,8 μM |
|                            | <i>5S rDNA</i>                | ACCCATCCAAGTACTGACCAC  | TGAAAACACCGGTTCTCGTCC     | this study | 0,4 μM |
| <i>Bombyx mori</i>         | <i>Acetylcholinesterase 2</i> | GCCTTTGGACGGGAATATTTA  | CGTAGACCACGACCAACTGA      | this study | 0,4 μM |
|                            | <i>U1 snRNA</i>               | TACTCCATTGCACTGCGGAG   | AATTACGCGTCCGAGTTACCC     | this study | 0,4 μM |
|                            | <i>U2 snRNA</i>               | CGGCCTTTGGCTAAGATCA    | GGAGCGAGCCCCTAACATC       | this study | 0,4 μM |
|                            | <i>5S rDNA</i>                | TGAAAACACCGGTTCTCGTCC  | CACCCATCCAAGTACTGACCG     | this study | 0,8 μM |

<sup>a</sup> 1. Dalíková, M. *et al.* New Insights into the Evolution of the W Chromosome in Lepidoptera. *J. Hered.* **108**, 709–719(2017).

Voleníková, A. Karyotype and sex chromosomes analysis of two species from basal lepidopteran family Hepialidae (Lepidoptera: Hepialidae). Master thesis (in Czech), University of South Bohemia, České Budějovice, Czech Republic (2014).

**Supplementary table S7:** Information about digestion reactions used for Southern hybridization.

| Species                         | Gene            | Restriction enzymes                     | Restriction enzymes                      | Restriction enzymes                     |
|---------------------------------|-----------------|-----------------------------------------|------------------------------------------|-----------------------------------------|
|                                 |                 | I                                       | II                                       | III                                     |
| <i>Glyphotaelius pellucidus</i> | <i>U1 snRNA</i> | <i>AfeI</i> + <i>XbaI</i> <sup>a</sup>  | <i>AfeI</i> + <i>BamHI</i> <sup>a</sup>  | <i>PstI</i> + <i>SalI</i> <sup>a</sup>  |
|                                 | <i>5S rDNA</i>  | <i>AfeI</i> + <i>BamHI</i> <sup>a</sup> | <i>PstI</i> + <i>SalI</i> <sup>a</sup>   | <i>AfeI</i> + <i>XbaI</i> <sup>a</sup>  |
| <i>Hepialus humuli</i>          | <i>U1 snRNA</i> | <i>AfeI</i> + <i>XbaI</i> <sup>a</sup>  | <i>AfeI</i> + <i>BamHI</i> <sup>a</sup>  | <i>PstI</i> + <i>SalI</i> <sup>a</sup>  |
|                                 | <i>5S rDNA</i>  | <i>AfeI</i> + <i>XbaI</i> <sup>a</sup>  | <i>AfeI</i> + <i>BamHI</i> <sup>a</sup>  | <i>PstI</i> + <i>SalI</i> <sup>a</sup>  |
| <i>Tischeria ekebladella</i>    | <i>U1 snRNA</i> | -                                       | -                                        | -                                       |
|                                 | <i>5S rDNA</i>  | <i>PstI</i> + <i>BspHI</i> <sup>a</sup> | <i>XbaI</i> + <i>BamHI</i> <sup>a</sup>  | <i>XbaI</i> + <i>NspI</i> <sup>a</sup>  |
| <i>Taleporia tubulosa</i>       | <i>U1 snRNA</i> | -                                       | -                                        | -                                       |
|                                 | <i>5S rDNA</i>  | <i>AfeI</i> + <i>XbaI</i> <sup>a</sup>  | <i>AfeI</i> + <i>BamHI</i> <sup>a</sup>  | <i>PstI</i> + <i>SalI</i> <sup>a</sup>  |
| <i>Tineola bisselliella</i>     | <i>U1 snRNA</i> | <i>AfeI</i> + <i>XbaI</i> <sup>a</sup>  | <i>AfeI</i> + <i>BamHI</i> <sup>a</sup>  | <i>PstI</i> + <i>SalI</i> <sup>a</sup>  |
|                                 | <i>5S rDNA</i>  | <i>AfeI</i> + <i>XbaI</i> <sup>a</sup>  | <i>AfeI</i> + <i>BamHI</i> <sup>a</sup>  | <i>PstI</i> + <i>SalI</i> <sup>a</sup>  |
| <i>Cameraria ohridella</i>      | <i>U1 snRNA</i> | <i>AfeI</i> + <i>XbaI</i> <sup>a</sup>  | <i>AfeI</i> + <i>BamHI</i> <sup>a</sup>  | <i>PstI</i> + <i>SalI</i> <sup>a</sup>  |
|                                 | <i>5S rDNA</i>  | <i>AfeI</i> + <i>XbaI</i> <sup>a</sup>  | <i>AfeI</i> + <i>BamHI</i> <sup>a</sup>  | <i>PstI</i> + <i>SalI</i> <sup>a</sup>  |
| <i>Yponomeuta evonymella</i>    | <i>U1 snRNA</i> | <i>NotI</i> + <i>XhoI</i> <sup>b</sup>  | <i>AfeI</i> + <i>BamHI</i> <sup>a</sup>  | <i>BamHI</i> + <i>SalI</i> <sup>a</sup> |
|                                 | <i>5S rDNA</i>  | <i>PstI</i> + <i>BspHI</i> <sup>a</sup> | <i>BspHI</i> + <i>BamHI</i> <sup>a</sup> | <i>XbaI</i> + <i>NspI</i> <sup>a</sup>  |
| <i>Ephestia kuehniella</i>      | <i>U1 snRNA</i> | <i>PstI</i> + <i>BspHI</i> <sup>a</sup> | <i>XbaI</i> + <i>BamHI</i> <sup>a</sup>  | <i>XbaI</i> + <i>NspI</i> <sup>a</sup>  |
|                                 | <i>5S rDNA</i>  | <i>PstI</i> + <i>BspHI</i> <sup>a</sup> | <i>XbaI</i> + <i>BamHI</i> <sup>a</sup>  | <i>XbaI</i> + <i>NspI</i> <sup>a</sup>  |
| <i>Cydia pomonella</i>          | <i>U1 snRNA</i> | <i>NotI</i> + <i>PstI</i> <sup>b</sup>  | <i>BamHI</i> + <i>SalI</i> <sup>a</sup>  | <i>AfeI</i> + <i>BamHI</i> <sup>a</sup> |
|                                 | <i>5S rDNA</i>  | <i>NotI</i> + <i>PstI</i> <sup>b</sup>  | <i>BamHI</i> + <i>SalI</i> <sup>a</sup>  | <i>AfeI</i> + <i>BamHI</i> <sup>a</sup> |
| <i>Bombyx mori</i>              | <i>U1 snRNA</i> | <i>PstI</i> + <i>BspHI</i> <sup>a</sup> | <i>XbaI</i> + <i>BamHI</i> <sup>a</sup>  | <i>XbaI</i> + <i>NspI</i> <sup>a</sup>  |
|                                 | <i>5S rDNA</i>  | <i>PstI</i> + <i>BspHI</i> <sup>a</sup> | <i>BspHI</i> + <i>BamHI</i> <sup>a</sup> | <i>XbaI</i> + <i>NspI</i> <sup>a</sup>  |

<sup>a</sup> CutSmart buffer, NEB (New England Biolabs, Ipswich, MA, USA)

<sup>b</sup> Buffer H + BSA + Triton (ThermoFisher Scientific, Waltham, MA, USA)
